# Supplementary material for: Associations of time of day with cardiovascular disease risk factors measured in older men: results from the British Regional Heart Study
Source: PubMed Central journal article supplement (PMC5695475; doi:10.1136/bmjopen-2017-018264), 2017-11-12
Supplement: bmjopen-2017-018264.draft_revisions.pdf [file bmjopen-2017-018264.draft_revisions.pdf]

# BMJ Open

BMJ Open is committed to open peer review. As part of this commitment we make the peer review history of every article we publish publicly available.

When an article is published we post the peer reviewers' comments and the authors' responses online. We also post the versions of the paper that were used during peer review. These are the versions that the peer review comments apply to.

The versions of the paper that follow are the versions that were submitted during the peer review process. They are not the versions of record or the final published versions. They should not be cited or distributed as the published version of this manuscript.

BMJ Open is an open access journal and the full, final, typeset and author-corrected version of record of the manuscript is available on our site with no access controls, subscription charges or pay-per-view fees (<http://bmjopen.bmj.com>).

If you have any questions on BMJ Open's open peer review process please email [editorial.bmjopen@bmj.com](mailto:editorial.bmjopen@bmj.com)

# BMJ Open

## Time of day variations in novel cardiovascular disease risk factors measured in older men

|                                 |                                                                                                                                                                                                                                                                                                                                                                                                                                                                                                                                                                                                                                                                             |
|---------------------------------|-----------------------------------------------------------------------------------------------------------------------------------------------------------------------------------------------------------------------------------------------------------------------------------------------------------------------------------------------------------------------------------------------------------------------------------------------------------------------------------------------------------------------------------------------------------------------------------------------------------------------------------------------------------------------------|
| Journal:                        | <i>BMJ Open</i>                                                                                                                                                                                                                                                                                                                                                                                                                                                                                                                                                                                                                                                             |
| Manuscript ID                   | bmjopen-2017-018264                                                                                                                                                                                                                                                                                                                                                                                                                                                                                                                                                                                                                                                         |
| Article Type:                   | Research                                                                                                                                                                                                                                                                                                                                                                                                                                                                                                                                                                                                                                                                    |
| Date Submitted by the Author:   | 16-Jun-2017                                                                                                                                                                                                                                                                                                                                                                                                                                                                                                                                                                                                                                                                 |
| Complete List of Authors:       | Sartini, Claudio; University College of London, Primary Care and Population Health<br>Whincup, Peter; St Georges, University of London, Population Health Research Institute<br>Wannamethee, Goya; University College London<br>Jefferis, Barbara ; University College London<br>Lennon, Lucy; UCL, Department of Primary Care and Population Health<br>Lowe, Gordon; University of Glasgow, Institute of Cardiovascular and Medical Sciences<br>Welsh, Paul; University of Glasgow, Institute of Cardiovascular and Medical Sciences<br>Sattar, Naveed; University of Glasgow, BHF centre<br>Morris, Richard; University of Bristol, School of Social & Community Medicine |
| <b>Primary Subject Heading</b>: | Epidemiology                                                                                                                                                                                                                                                                                                                                                                                                                                                                                                                                                                                                                                                                |
| Secondary Subject Heading:      | Public health                                                                                                                                                                                                                                                                                                                                                                                                                                                                                                                                                                                                                                                               |
| Keywords:                       | biological markers, older adults, cardiovascular disease, diurnal variations                                                                                                                                                                                                                                                                                                                                                                                                                                                                                                                                                                                                |
|                                 |                                                                                                                                                                                                                                                                                                                                                                                                                                                                                                                                                                                                                                                                             |

SCHOLARONE™  
Manuscripts

1  
2  
3 1 **Title:** Time of day variations in novel cardiovascular disease risk factors measured in older  
4 2 men

5  
6  
7  
8 3 Claudio Sartini, MSc <sup>1</sup> \*, Peter H Whincup, PhD <sup>2</sup>, S Goya Wannamethee, PhD <sup>1</sup>, Barbara J  
9 4 Jefferis, PhD <sup>1</sup>, Lucy Lennon, MSc <sup>1</sup>, Gordon DO Lowe, PhD <sup>3</sup>, Paul Welsh, PhD <sup>3</sup>, Naveed  
10 5 Sattar, PhD <sup>3</sup>, and Richard W Morris, PhD <sup>4</sup>

11  
12  
13  
14  
15 6 <sup>1</sup>Department of Primary Care & Population Health, University College London, Rowland Hill  
16 7 Street, NW3 2PF, London. UK

17  
18  
19  
20 8 <sup>2</sup>Population Health Research Institute, St George's University of London, Cranmer Terrace  
21 9 London SW17 0RE, UK.

22  
23  
24 10 <sup>3</sup> Institute of Cardiovascular and Medical Sciences, University of Glasgow, Glasgow G12 8TA  
25 11 UK

26  
27  
28  
29 12 <sup>4</sup> School of Social & Community Medicine, University of Bristol, Canynge Hall, 39 Whatley Rd,  
30 13 Bristol BS8 2PS, UK.

31  
32  
33  
34  
35  
36 15 \* Corresponding Author

37  
38  
39 16 E-mail: [c.sartini@ucl.ac.uk](mailto:c.sartini@ucl.ac.uk)

40  
41  
42  
43  
44  
45  
46  
47  
48  
49  
50  
51  
52  
53  
54  
55  
56  
57  
58  
59  
60

18 **Manuscript number of words:** 3897 words (including title page, abstract, manuscript,  
19 tables).

1  
2  
3 21 **Abstract (250 words, now 250)**  
4  
5

6 22 **Objective:** We estimated associations of time of day with novel cardiovascular disease (CVD)  
7 23 risk factors measured in older men.

8  
9 24 **Methods:** Novel CVD risk factors (markers of inflammation and haemostasis, and cardiac  
10 25 markers) were measured on one occasion between 08:00-19:00 hours in 4252 men aged 60-  
11 26 79 years from the British Regional Heart Study. Linear models were used to estimate  
12 27 associations between time of day and risk factors. When an association was found, we  
13 28 examined whether the relationship between risk factors and cardiovascular mortality was  
14 29 affected by the adjustment for time of day using survival analyses.

15  
16 30 **Results:** N-terminal pro-brain natriuretic peptide (NT-ProBNP) levels increased by 3.3% per  
17 31 hour [95% Confidence interval (CI) 1.9; 4.8], Interleukin-6 (IL-6) increased by 2.6% per hour  
18 32 (95% CI 1.8; 3.4), while Tissue plasminogen activator (t-PA) decreased by 3.3% per hour  
19 33 (95% CI 3.7; 2.9); these associations were unaffected by adjustment for possible  
20 34 confounding factors. The percentages of variation in these risk factors attributable to time  
21 35 of day were less than 2%. In survival analyses, the association of IL-6, NT-ProBNP, and t-PA  
22 36 with cardiovascular mortality was not affected by the adjustment for time of day. C-Reactive  
23 37 Protein, Fibrinogen, D-Dimer, von Willebrand Factor, and cardiac Troponin T showed no  
24 38 associations with time of day.

25 39 **Conclusions:** In older men, markers of inflammation (IL-6), haemostasis (t-PA), and a cardiac  
26 40 marker (NT-ProBNP) varied by time of day. The contribution of time of day to variations in  
27 41 these markers was small, and did not appear to be relevant for the CVD risk prediction.  
28  
29  
30  
31  
32  
33  
34  
35  
36  
37  
38  
39  
40  
41  
42  
43  
44  
45  
46  
47  
48  
49  
50  
51  
52  
53  
54  
55  
56  
57  
58  
59  
60

1  
2  
3 42 **Strengths and limitations of this study (Max 5 points)**  
4

5 43 1) In older adults diurnal variations in novel CVD risk factors have not been yet estimated; to  
6  
7 44 our knowledge the findings from this study are novel  
8

9 45 2) Previous studies suggested that diurnal variations in CVD risk factors could be relevant for  
10  
11 46 cardiovascular risk prediction, but without testing the validity of this statement using  
12  
13 47 statistical analysis. Our analysis answered this question and went beyond simple descriptive  
14  
15 48 diurnal patterns of CVD risk factors

16 49 3) The BRHS cohort benefits from using a large scale population-based sample of free-living  
17  
18 50 older men and this increases statistical power and precision of estimates.

19  
20 51 4) However, the BRHS comprises male participants only, predominantly of white European  
21  
22 52 ethnic origin, so findings may not be generalisable to women and non-white ethnic groups.  
23  
24  
25  
26  
27  
28  
29  
30  
31  
32  
33  
34  
35  
36  
37  
38  
39  
40  
41  
42  
43  
44  
45  
46  
47  
48  
49  
50  
51  
52  
53  
54  
55  
56  
57  
58  
59  
60

## 53 Background

54  
55 Previous studies have reported time of day variation in both established and novel  
56 cardiovascular disease (CVD) risk factors in middle aged adults, such as blood pressure,  
57 lipids and some well-established inflammatory and haemostatic factors (e.g. white blood  
58 cell, red blood cell, and platelets counts) <sup>1-3</sup>. However, the extent to which novel CVD risk  
59 factors such as Interleukin-6, a marker of inflammation causally associated with CHD in a  
60 recent study <sup>4</sup>, and N-terminal pro-brain natriuretic peptide, a promising marker of heart  
61 failure <sup>5</sup> vary by time of day have been less studied. Moreover, very little is known on time  
62 of day variations in other emerging risk factors prospectively associated with CVD (e.g. t-PA,  
63 D-Dimer, von Willebrand factor, and Cardiac Troponin T), although their causal association  
64 with CVD remain debated or not yet tested.

65  
66 We would expect that time of day variations in some novel CVD risk factors measured in  
67 older adults may occur, consistent with findings in younger populations <sup>6</sup>. However, in older  
68 adults the degree of difference attributable to time of day has not been yet estimated;  
69 establishing its importance and its effects on prediction of CVD risk is important given the  
70 potentially wider use of N-terminal pro-brain natriuretic peptide in risk stratification (as  
71 shown in a recent major meta-analysis in the general population <sup>7</sup>), and potential causal link  
72 between IL-6 and cardiovascular disease <sup>4</sup>. Therefore, the aim of this study was to  
73 investigate how novel CVD risk factors, including markers of inflammation, haemostasis and  
74 myocardial function, varied by time of day in older British men.

## 76 Methods

### 77 *Participants*

78 The British Regional Heart Study (BRHS) is a prospective cohort study of cardiovascular  
79 disease involving 7735 middle aged men (40-59 years) selected in 1978-80 from the age-sex  
80 registers of one local primary care centre in 24 British towns <sup>8</sup>. The 24 towns were selected  
81 to represent the variation in cardiovascular disease across the UK <sup>9</sup>. The National Research  
82 Ethics Service (NRES) Committee for London provided ethical approval. Participants  
83 provided informed written consent to the investigation, which was performed in accordance  
84 with the Declaration of Helsinki <sup>10</sup>.

1  
2  
3 85  
4  
5 86 *Follow-up examination*  
6  
7 87 In 1998-2000, an average of 20 years after the initial recruitment, 4252 surviving  
8  
9 88 participants (77% response rate) aged 60-79 years who were resident in the UK attended a  
10  
11 89 physical examination during which nurses took a fasting blood sample on one occasion for  
12  
13 90 each participant.. The men were asked to fast for a minimum of 6 hours, during which they  
14  
15 91 were instructed to drink only water, as previously reported <sup>2</sup>. The blood samples were  
16  
17 92 collected between 08:00 h and 19:00 h and then assayed for a range of biochemical and  
18  
19 93 haematological markers. The participants were also asked to complete a questionnaire  
20  
21 94 which included questions on other established CVD risk factors, such as age, social class,  
22  
23 95 smoking habits, alcohol consumption, and physical activity. Specifically, physical activity  
24  
25 96 levels were self-reported <sup>11</sup> and recently validated using accelerometers <sup>12</sup>. Incident CVD,  
26  
27 97 including non-fatal stroke and non-fatal MI were recorded: their definitions have been  
28  
29 98 reported elsewhere <sup>13</sup>. Men were also asked whether a doctor had ever told them that they  
30  
31 99 had heart failure <sup>5</sup>. The number of blood samples collected and included in the analyses  
32  
33 100 differ according to the risk factor measurements (the number of observations varied from  
34  
35 101 3580 for N-terminal Pro-Brain Natriuretic Peptide to 3863 for von Willebrand Factor in  
36  
37 102 complete case analyses including all covariates of interest).  
38  
39 103

#### 104 **Novel risk factors**

105 Circulating levels of markers of inflammation (C-reactive protein [CRP], Interleukin 6 [IL-6],  
106 Fibrinogen), cardiac markers (N-terminal pro-brain natriuretic peptide [NT-ProBNP], cardiac  
107 Troponin T [cTnT], and markers of haemostasis (tissue plasminogen activator [t-PA] antigen,  
108 fibrin D-dimer, von Willebrand factor [vWF]) were measured.

109  
110 Plasma D-dimer and t-PA levels were measured using an enzyme-linked immunosorbent  
111 assay (ELISA; Biopool AB, Umeå, Sweden), as was VWF antigen (Dako, High Wycombe, UK).  
112 C-reactive protein was assayed using ultrasensitive nephelometry (Dade Behring, Milton  
113 Keynes, UK). IL-6 was assayed using a high-sensitivity ELISA (R & D Sys-tems, Oxford, UK).  
114 Fibrinogen was assayed using an auto-mated Clauss assay in a coagulometer (MDA-180,  
115 Organon Teknika, Cambridge, UK). NT-proBNP and hsTnT were measured in plasma samples  
116 on an automated clinically validated immunoassay analyzer (e411, Roche Diagnostics,

1  
2  
3 117 Burgess Hill, United Kingdom) using the manufacturers' calibrators and quality control  
4  
5 118 reagents. Intra- and inter-assay Coefficient of Variations (CVs) were, respectively: 4.1% and  
6  
7 119 6.6% for t-PA; 3.2% and 4.2% for vWF; 4.7% and 5.2% for D-dimer; 4.7% and 8.3% for CRP;  
8  
9 120 7.5% and 8.9% for IL-6; 2.6% and 3.7% for Fibrinogen, and 4.4% and 7.7% for NT-ProBNP and  
10  
11 121 cTnT.

12 122

### 13 123 **Statistical methods**

14 124

15  
16  
17 125 Firstly, the distributions of the outcomes were examined; the outcomes were log-  
18  
19 126 transformed as the distributions were positively skewed. Therefore, analysis was carried out  
20  
21 127 on their log-transformed values throughout. Unadjusted geometric means and 95%  
22  
23 128 Confidence Intervals [CI] of the outcomes were plotted against hour of the day.

24 129

#### 25 26 130 *Adjusted associations between time of day and the outcomes*

27  
28 131

29  
30 132 Associations between time of day (fitted as a continuous variable, range 8-18) and the  
31  
32 133 outcomes were examined using linear multilevel random intercept models (level 1 =  
33  
34 134 individual, level 2 = town of residence). The results can be interpreted as between-person  
35  
36 135 variations over the course of the examination day; the estimates from the linear model  
37  
38 136 were reported as the difference in the outcome levels per hour of sampling over the  
39  
40 137 examination day. As the outcomes were log-transformed, the results were reported as  
41  
42 138 percent difference in the outcome geometric mean per hour of sampling. All models were  
43  
44 139 initially adjusted for age only. Next, the models were adjusted for age and other possible  
45  
46 140 confounding factors: social class, BMI, previous stroke or myocardial infarction (MI), physical  
47  
48 141 activity, smoking status, alcohol consumption, use of statin, and a seasonal term (fitted  
49  
50 142 using a cosinor function, as in previous studies)<sup>14</sup>. As NT-ProBNP and cTnT are principally  
51  
52 143 markers of heart failure, the association with time of day was adjusted for previous heart  
53  
54 144 failure.

55 145

56 146 When the association of time of the day with the outcomes was found to be statistically  
57  
58 147 significant, the proportion of variance associated with time of the day was estimated using  
59  
60 148 partial R-squared.



1  
2  
3 149 *Sensitivity analyses*

4 150 Five sensitivity analyses were performed: (i) all models were additionally adjusted for fasting  
5 151 time; (ii) interactions were fitted to test whether the time of day associations were modified  
6 152 by age (fitted as continuous variable); (iii) as NT-ProBNP and cTnT were acknowledged as  
7 153 specific cardiac markers <sup>5</sup>, interactions were fitted to test whether the time of day  
8 154 associations were modified by previous heart failure (yes/no); (iv) to explore the potential of  
9 155 undiagnosed heart failure or cardiac damage influencing findings for NT-ProBNP and cTnT,  
10 156 we repeated regression models after excluding men with NTproBNP > 400 pg/ml; (v) a  
11 157 quadratic term for time of day was added to the models in order to check for non-linearity  
12 158

13 159 As IL-6 has been causally associated with cardiovascular risk <sup>4</sup>, and prospectively associated  
14 160 with CVD mortality in the BRHS sample used here <sup>15</sup>, we investigated the relevance of time  
15 161 of day to the cardiovascular risk prediction by performing two survival analyses: in the first  
16 162 analysis we used Cox models where unadjusted log IL-6 was used as the predictor and CVD  
17 163 mortality as the clinical outcome; then, we repeated the same analysis using log IL-6  
18 164 standardised by the time of day rather than unadjusted log IL-6. For completeness of  
19 165 information, we repeated this sensitivity analysis for NT-ProBNP and t-PA.  
20 166

21 167 **Results**

22 168  
23 169 The characteristics of the study participants (mean age 68.7 years, standard deviation (SD) =  
24 170 5.5) are reported in Table 1. The associations between time of day (by hour) and risk factors  
25 171 are shown in Figure 1. Evidence of an increase over the course of the day was particularly  
26 172 noticeable for IL-6, and for NT-ProBNP (Figure 1). Also, levels of t-PA were lower in the  
27 173 afternoon in comparison with morning, while variations by time of day for other risk factors  
28 174 were not clearly observable from the plots (Figure 1). The results of corresponding linear  
29 175 regression analyses are shown in Table 2: statistically significant associations between time  
30 176 of the day and some outcomes were found (Table 2): over the course of the examination  
31 177 day NT-ProBNP levels increased by 3.3% per hour (95% CI 1.9; 4.8%), IL-6 increased by 2.6%  
32 178 per hour (95% CI 1.8; 3.4%). Conversely, t-PA decreased by 3.3% per hour (95% CI 3.7; 2.9%).  
33 179 The proportion of variance associated with time of the day from the fully adjusted models  
34 180 was 0.5%, 1%, and 2% for NT-ProBNP, IL-6, and t-PA respectively.  
35  
36  
37  
38  
39  
40  
41  
42  
43  
44  
45  
46  
47  
48  
49  
50  
51  
52  
53  
54  
55  
56  
57  
58  
59  
60

1  
2  
3 181 C-Reactive Protein, Fibrinogen, D-Dimer, von Willebrand Factor, and cardiac Troponin T  
4 182 showed no consistent associations with time of day (Table 2).  
5  
6  
7 183

8 184 *Sensitivity analyses*

9  
10 185 Overall, we found that fasting time did not alter the magnitude of associations between  
11 186 time of the day and the outcomes reported in Table 2. Only the association between time of  
12 187 the day and t-PA was strongly attenuated after accounting for fasting time (fitted as  
13 188 continuous variable): the decrease in t-PA levels was -3.3% (95%CI -3.7; -2.9) per hour  
14 189 before the adjustment (Table 2) and -1.4% (95%CI -2.2; -0.1) after the adjustment for  
15 190 fasting.  
16  
17  
18  
19  
20  
21 191

22 192 For all outcomes, we also did not find evidence for an interaction between time of day  
23 193 with age (results not shown).  
24  
25  
26 194

27  
28 195 In stratified analysis, NT-ProBNP levels increased by 3.4% (95% CI 1.9; 4.8%,  $p < 0.001$ ) per  
29 196 hour in older men without heart failure. Although men who previously had heart failure had  
30 197 increased NT-ProBNP levels, there was no evidence for an interaction between previous  
31 198 heart failure with time of the day ( $p = 0.954$ ). After excluding 466 men with NTproBNP levels  
32 199  $> 400$  pg/ml (12% of the sample), associations between time of the day measures and  
33 200 NTproBNP remained statistically significant and slightly increased in magnitude (3.9% [95%  
34 201 CI 2.7; 5.1%],  $p < 0.001$ ). As reported in the main analysis, no significant associations were  
35 202 found between time of the day and cTnT in stratified analysis.  
36  
37  
38  
39  
40  
41  
42 203

43 204 When adding a quadratic term to the model, we found a significant improvement in model  
44 205 fit for IL-6 only ( $p = 0.030$  for the time of day squared term). The association of time of day  
45 206 with IL-6 appeared to be slightly J-shaped, with a linear increase starting from 11:00 until  
46 207 18:00 hours.  
47  
48  
49  
50 208

51  
52 209 We examined whether adjustment for hour of day affected the associations between risk  
53 210 factors and CVD mortality. In survival analysis, higher levels of log IL-6 were associated with  
54 211 increased CVD mortality (HR=1.70, 95%CI 1.54; 1.87). Standardising IL-6 by time of the day  
55 212 did not change the relationship (HR=1.71, 95%CI 1.55; 1.88). Also, standardising NT-ProBNP  
56  
57  
58  
59  
60

1  
2  
3 213 levels by time of the day did not alter the magnitude of the effect on CVD mortality  
4 214 (HR=1.92, 95%CI 1.81; 2.04). Finally, associations of t-PA levels with increased CVD mortality  
5 215 did not change substantially before (HR=1.74, 95%CI 1.45; 2.09) and after standardising  
6 216 (HR=1.77, 95%CI 1.47; 2.14) by time of the day.  
7  
8  
9

10 217

## 11 218 **Discussion**

12  
13  
14 219 To our knowledge, this is the largest investigation of relationships between time of day and  
15 220 novel CVD risk factors in older men. After adjusting our analysis for potential confounding  
16 221 factors we demonstrated that some, but not all, novel CVD risk factors levels varied by time  
17 222 of day. In particular, NT-ProBNP and IL-6 increased linearly over the course of the day.  
18 223 Conversely, a decrease in t-PA was also observed; however, after accounting for fasting time  
19 224 the relationship with time of the day was strongly attenuated (therefore fasting time could  
20 225 partially explain the drop in t-PA levels observed in the afternoon vs morning). Also, we  
21 226 observed a weak contribution of time of the day to the overall variation of these markers. In  
22 227 sensitivity analyses, we observed that time of day did not have a sufficiently strong effect to  
23 228 be taken into account when assessing the impact of IL-6, NT-ProBNP, and t-PA on CVD  
24 229 mortality. Lastly, an association of time of day with other novel risk factors was not  
25 230 observed.  
26  
27  
28  
29  
30  
31  
32  
33  
34

35 231

36  
37 232 Literature on time of day variation in novel CVD markers of inflammation and haemostasis  
38 233 in older adults is limited; to our knowledge this is the first time these findings have been  
39 234 reported in older adults. Findings from earlier studies of younger adults were fairly  
40 235 consistent with ours. For example a recent meta-analysis of several small studies which  
41 236 analysed IL-6 proposed a diurnal pattern, with overall IL-6 levels increased between 08:00  
42 237 and 18:00 hours as in our study<sup>16</sup>. However, in two previous very small studies of twelve<sup>17</sup>  
43 238 and five<sup>18</sup> participants, IL-6 peaked in the night-time. It is possible that peaks in IL-6 levels  
44 239 may be associated with cognitive symptoms of depression<sup>19</sup> and daily activities, although in  
45 240 the BRHS population this has not yet been investigated. One previous study found that BRHS  
46 241 men were more active in the morning and in early afternoon<sup>20</sup> when the main activities  
47 242 were usually gardening, house works, shopping, or leisure walking. Whether IL-6 was  
48  
49  
50  
51  
52  
53  
54  
55  
56  
57  
58  
59  
60

1  
2  
3 243 implicated in this daily pattern remains uncertain and can potentially be explored in future  
4 244 studies.

5 245  
6  
7  
8 246 Moreover, one previous study reported increased levels of NT-ProBNP over the course of  
9 247 day <sup>21</sup> as we observed in our study. A decrease in t-PA over the examination day was also  
10 248 reported in younger subjects (a 45-year-old UK population of 9377 men and women) <sup>6</sup>;  
11 249 however, t-PA did not vary by time of the day in a previous study large study of 1288  
12 250 healthy 25 to 64-year-old men and women <sup>22</sup>.

13 251  
14  
15  
16  
17  
18  
19 252 In comparison to our study, findings regarding CRP, Fibrinogen, D-dimer, vWF and cTnT  
20 253 reported in earlier studies of younger adults were similar: a few previous studies reported  
21 254 that they did not find an association of time of day with CRP <sup>23</sup>, D-dimer <sup>24</sup>, and vWF <sup>25</sup>. In  
22 255 one study, the variation in CRP, Fibrinogen, D-dimer, and vWF attributable to time of day  
23 256 was minimal <sup>6</sup>. Literature on cTnT is scarce: one small previous study of repeated measures  
24 257 in 7 participants with type 2 diabetes reported a decrease in cTnT between 8am and 8pm <sup>26</sup>.

25 258  
26  
27  
28  
29  
30  
31 259 Although one previous study suggested that diurnal variations in CVD risk factors could be  
32 260 relevant for cardiovascular risk prediction <sup>6</sup>, a prediction model like the one described in our  
33 261 survival analysis was not performed. Our findings suggested the effect of time of the day  
34 262 (from 08:00 h to 19:00 h) is not relevant for the CVD risk assessment. With this sensitivity  
35 263 analysis we wanted to investigate time of day variations beyond simple descriptive diurnal  
36 264 patterns; to our knowledge this is the first time this finding has been reported.

37 265

#### 38 266 *Strengths and limitations*

39 267 The BRHS cohort benefits from using a large scale population-based sample of free-living  
40 268 older men and this increases statistical power and precision of estimates. However, the  
41 269 BRHS comprises male participants, predominantly of white European ethnic origin, so  
42 270 findings may not be generalisable to women and non-white ethnic groups. The CVD risk  
43 271 factors measurements were carried out on one occasion over an extended period of the day  
44 272 (between 08:00 and 18:00 hours), offering only a partial understanding of the variations  
45 273 over the 24 hours <sup>27 28</sup>. Therefore, in this study the relationship of the CVD risk factors to  
46 274 time of day was explored using between-participant variation only. In future studies it may

1  
2  
3 275 be advantageous to carry out repeated measurement of the risk factors over the 24 hours in  
4 276 order to investigate within-person circadian variations. However, with repeated  
5 277 measurements a possible and genuine diurnal variation may be disrupted and natural  
6 278 sleeping patterns altered (repeated measures are usually taken every 1-2 hours during the  
7 279 night)<sup>29</sup>.

280

### 281 *Implications*

282 Variations of some CVD factors (in particular IL-6 and NT-ProBNP) over the course of the day  
283 were observed, suggesting the role of time of the day as potential confounder during the  
284 measurements. However, standardising these biological markers by time of day was not  
285 particularly relevant for the cardiovascular risk prediction. Also, other sensitivity analyses  
286 (stratified analysis and interaction tests) did not add relevant insights suggesting that time  
287 of day variations may be not important for clinical risk stratification in general. Further  
288 studies assessing both CVD risk factors levels and clinical outcomes (e.g. fatal or non-fatal  
289 CVD events) during 24h are required to demonstrate whether a rapid increase of IL-6 over  
290 the day may be relevant to the increased number of CVD events observed in early and late  
291 morning<sup>30</sup>, and whether the increased levels of NT-ProBNP over the day are related to the  
292 afternoon peak in sudden death following heart failure<sup>31</sup>.

293

### 294 **Conclusions**

295 Variations in time of day were associated with variations of some, but not all, novel CVD risk  
296 factors measured in older adults. The contribution of time of the day to the markers' overall  
297 variation was small and unlikely to affect the CVD risk prediction or clinical risk stratification.

298

### 299 **AUTHORS CONTRIBUTIONS**

300 CS processed the data, performed statistical analyses, drafted and revised the manuscript,  
301 and incorporated revisions of co-authors. PHW, SGW, BJ, and RM contributed to the design  
302 of the study and revised the manuscript. LL enrolled participants, and collected data. PHW,  
303 RM and SGW raised grant funding. All authors gave an intellectual contribution to the  
304 manuscript and approved the final version.

305

### 306 **Acknowledgements**

1  
2  
3 307 The BRHS is supported by a British Heart Foundation (BHF) programme grant  
4 308 (RG/13/16/30528). This research was supported by a BHF project grant (PG/13/41/30304)  
5  
6 309 which supported CS. The funders had no role in the design and conduct of the study;  
7  
8 310 collection, management, analysis, and interpretation of the data; preparation, review, or  
9  
10 311 approval of the manuscript; and the decision to submit the manuscript for publication. The  
11  
12 312 views expressed in this publication are those of the author(s) and not necessarily those of  
13  
14 313 the BHF.

15  
16 314

17 **Conflict of interest statement**

18  
19 316 The authors report no relationships that could be construed as a conflict of interest

20  
21 317

22  
23 **Data sharing statement**

24 319 The collection and management of data over the last 39 years of the BRHS has been made  
25  
26 320 possible through grant funding from UK government agencies and charities. We welcome  
27  
28 321 proposals for collaborative projects and data sharing. For general data sharing enquiries,  
29  
30 322 please contact Lucy Lennon l.lennon@ucl.ac.uk

323 **Table 1** –Individual characteristics and risk factors levels in BRHS men who attended the  
 324 examinations in 1998-2000

|                                                   |               |
|---------------------------------------------------|---------------|
| <i>Demographic and background characteristics</i> |               |
| Age (years), mean (SD)                            | 68.7 (5.5)    |
| Social class (manual)                             |               |
| Manual, n (%)                                     | 2166 (51.1)   |
| Non-Manual, n (%)                                 | 1966 (46.3)   |
| HMF, n (%)                                        | 112 (2.6)     |
| <i>Physical health</i>                            |               |
| BMI, mean (SD)                                    | 26.9 (3.7)    |
| Prevalence of stroke/myocardial infarction, n (%) | 153 (3.6)     |
| Prevalence of heart failure, n (%)                | 390 (9.2)     |
| <i>Behavioural factors</i>                        |               |
| Smoking                                           |               |
| Never, n (%)                                      | 1233 (29.1)   |
| Ex-smokers, n (%)                                 | 2464 (58.0)   |
| Smokers, n (%)                                    | 548 (12.9)    |
| Alcohol consumption                               |               |
| None, n (%)                                       | 431 (10.3)    |
| Occasional/light, n (%) <sup>1</sup>              | 2949 (70.5)   |
| Moderate/Heavy, n (%) <sup>2</sup>                | 779 (18.6)    |
| Physical activity level                           |               |
| Inactive, n (%)                                   | 471 (11.5)    |
| Occasionally, n (%)                               | 957 (23.4)    |
| Light, n (%)                                      | 767 (18.7)    |
| Moderate, n (%)                                   | 591 (14.4)    |
| Moderate vigorous, n (%)                          | 690 (16.8)    |
| Vigorous, n (%)                                   | 621 (15.1)    |
| <i>CVD risk factor, geometric mean (SD)</i>       |               |
| CRP, mg/L                                         | 1.74 (3.03)   |
| IL-6, pg/mL                                       | 2.46 (1.94)   |
| Fibrinogen, g/L                                   | 3.19 (1.25)   |
| t-PA, ng/mL                                       | 10.23 (1.50)  |
| vWF, IU/dL                                        | 132.41 (1.40) |
| D-dimer, ng/mL                                    | 84.32 (2.32)  |
| NT-ProBNP, pg/mL                                  | 101.50 (3.32) |
| cTnT, pg/mL                                       | 12.07 (1.64)  |

325

326 <sup>1</sup> >=1 and <=15 units per week (1 unit is approximately 1 drink, such as one glass of wine)327 <sup>2</sup> >=16 units per week (1 unit is approximately 1 drink, such as one glass of wine)

328

329 **Table 2** – Cross-sectional adjusted associations between time of day (fitted as continuous  
 330 variable) and CVD risk factors measured in BRHS men (aged 60-79) attending the follow-up  
 331 year 20 examination in 1998-2000. Associations are reported as percent difference in CVD  
 332 risk factors levels per one hour of sampling over the examination day (08:00-19:00h). The  
 333 statistically significant associations are marked in bold.  
 334

| CVD risk factor | Model 1: Age adjusted <sup>1</sup>                                                               |         | Model 2: Fully adjusted <sup>2</sup>                                                             |         |
|-----------------|--------------------------------------------------------------------------------------------------|---------|--------------------------------------------------------------------------------------------------|---------|
|                 | Percent difference (95%CI)<br>in the CVD risk factor levels<br>per hour of sampling <sup>3</sup> | p-value | Percent difference (95%CI)<br>in the CVD risk factor levels<br>per hour of sampling <sup>3</sup> | p-value |
| NT-ProBNP       | <b>3.5 (2.0;5.0)</b>                                                                             | <0.001  | <b>3.3 (1.9; 4.8)</b>                                                                            | <0.001  |
| IL-6            | <b>2.6 (1.7;3.4)</b>                                                                             | <0.001  | <b>2.6 (1.8; 3.4)</b>                                                                            | <0.001  |
| t-PA            | <b>-3.3 (-3.8;-2.9)</b>                                                                          | <0.001  | <b>-3.3 (-3.7; -2.9)</b>                                                                         | <0.001  |
| Fibrinogen      | -0.2 (-0.5;0.0)                                                                                  | 0.088   | -0.2 (-0.5; 0.1)                                                                                 | 0.104   |
| cTnT            | -0.4 (-0.9;0.2)                                                                                  | 0.194   | -0.4 (-1.0; 0.2)                                                                                 | 0.174   |
| CRP             | -1.0 (-2.3;0.4)                                                                                  | 0.151   | -0.9 (-2.2; 0.4)                                                                                 | 0.175   |
| vWF             | -0.2 (-0.6;0.2)                                                                                  | 0.374   | -0.2 (-0.6; 0.2)                                                                                 | 0.380   |
| D-Dimer         | -0.0 (-1.0;1.0)                                                                                  | 0.929   | -0.1 (-1.0; 0.9)                                                                                 | 0.890   |

335 <sup>1</sup> Model 1: Two level linear models (level 1 = person, level 2 = town of residence during the  
 336 BRHS recruitment) adjusted for age. Model 1 used the same number of observations of  
 337 Model 2 (complete case analysis).

338 <sup>2</sup> Model 2 = Model 1 additionally adjusted for social class, BMI, smoking status, alcohol  
 339 consumption, physical activity, use of statin, and season. Associations with IL-6, t-PA,  
 340 Fibrinogen, CRP, vWF, and D-Dimer were additionally adjusted for prevalence of stroke/MI,  
 341 while association of time of the day with NT-ProBNP and cTnT models were additionally  
 342 adjusted for prevalence of heart failure.

343 <sup>3</sup> Model 1 and Model 2 used the number of observations: 3580 for NT-ProBNP, 3832 for IL-6,  
 344 3863 for t-PA, 3861 for Fibrinogen, 3827 for cTnT, 3838 for CRP, 3863 for vWF, 3859 for D-  
 345 Dimer

346



1  
2  
3  
4  
5  
6  
7  
8  
9  
10  
11  
12  
13  
14  
15  
16  
17  
18  
19  
20  
21  
22  
23  
24  
25  
26  
27  
28  
29  
30  
31  
32  
33  
34  
35  
36  
37  
38  
39  
40  
41  
42  
43  
44  
45  
46  
47  
48  
49

347 **Figure 1** – Unadjusted geometric means (95% CI) by time of the day<sup>1</sup> for CRP, IL-6, Fibrinogen t-PA (top), vWF, D-Dimer, NT-ProBNP and cTnT  
348 (bottom) measured on one occasion in BRHS men aged 60-79 during the years 1998-2000.

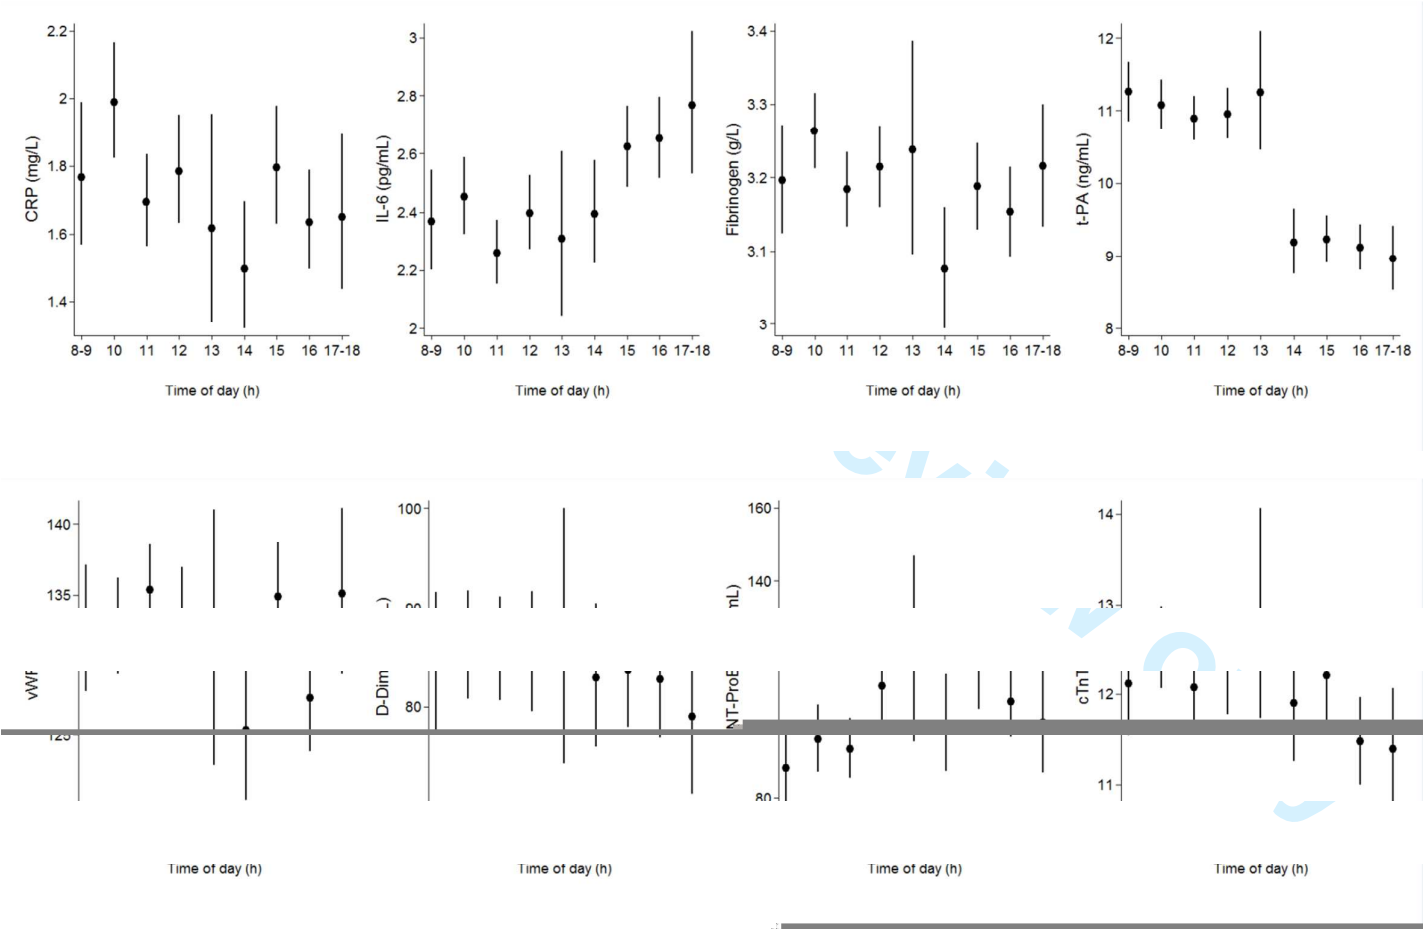

349

350

351

352

<sup>1</sup> Total number of men examined per hour was 33(0.7%) at 08:00-08:59, 363(8.5%) at 8:00-9:59h, 699(16%) at 10:00-10:59h, 771(18%) at 11:00-11:59h, 591(14%) at 12:00-12:59h, 99(2%) at 13:00-13:59h, 306(7%) at 14:00-14:59, 560(13%) at 15:00-15:59h, 566(13%) at 16:00-16:59, 260(6%) at 17:00-17:59, and 3(<0.1%) at 18:00-18:59

353

## References

1. Pocock SJ, Ashby D, Shaper AG, *et al.* Diurnal variations in serum biochemical and haematological measurements. *Journal of clinical pathology*. 1989; 42: 172-9.
2. Emberson JR, Whincup PH, Walker M, *et al.* Biochemical measures in a population-based study: effect of fasting duration and time of day. *Annals of clinical biochemistry*. 2002; 39: 493-501.
3. Elliott WJ. Circadian variation in blood pressure: Implications for the elderly patient. *American Journal of Hypertension*. 1999; 12: 43S-9S.
4. IL6R Genetics Consortium and Emerging Risk Factors Collaboration. Interleukin-6 receptor pathways in coronary heart disease: a collaborative meta-analysis of 82 studies. *The Lancet*. 2012; 379: 1205-13.
5. Wannamethee SG, Shaper AG, Papacosta O, *et al.* Lung function and airway obstruction: associations with circulating markers of cardiac function and incident heart failure in older men-the British Regional Heart Study. *Thorax*. 2016; 71: 526-34.
6. Rudnicka AR, Rumley A, Lowe GD, *et al.* Diurnal, seasonal, and blood-processing patterns in levels of circulating fibrinogen, fibrin D-dimer, C-reactive protein, tissue plasminogen activator, and von Willebrand factor in a 45-year-old population. *Circulation*. 2007; 115: 996-1003.
7. Natriuretic Peptides Studies Collaboration. Natriuretic peptides and integrated risk assessment for cardiovascular disease: an individual-participant-data meta-analysis. *The lancet Diabetes & endocrinology*. 2016; 4: 840-9.
8. Shaper AG, Pocock SJ, Walker M, *et al.* British Regional Heart Study: cardiovascular risk factors in middle-aged men in 24 towns. *BMJ*. 1981; 283: 179-86.
9. Pocock SJ, Shaper AG, Cook DG, *et al.* British Regional Heart Study: geographic variations in cardiovascular mortality, and the role of water quality. *British Medical Journal*. 1980; 280: 1243-9.
10. Declaration of Helsinki - Ethical Principles for Medical Research Involving Human Subjects. *WMA Declaration of Helsinki*. WMA Declaration of Helsinki October 2013.
11. Wannamethee G and Shaper AG. Physical activity and stroke in British middle aged men. *BMJ : British Medical Journal*. 1992; 304: 597-601.
12. Jefferis BJ, Sartini C, Ash S, *et al.* Validity of questionnaire-based assessment of sedentary behaviour and physical activity in a population-based cohort of older men; comparisons with objectively measured physical activity data. *Int J Behav Nutr Phys Act*. 2016; 13: 14.
13. Sartini C, Barry SJ, Wannamethee SG, *et al.* Effect of cold spells and their modifiers on cardiovascular disease events: Evidence from two prospective studies. *Int J Cardiol*. 2016; 218: 275-83.
14. Stolwijk AM, Straatman H and Zielhuis GA. Studying seasonality by using sine and cosine functions in regression analysis. *Journal of Epidemiology and Community Health*. 1999; 53: 235-8.
15. Wannamethee SG, Whincup PH, Lennon L, *et al.* Associations Between Fibrin D-Dimer, Markers of Inflammation, Incident Self-Reported Mobility Limitation, and All-Cause Mortality in Older Men. *Journal of the American Geriatrics Society*. 2014; 62: 2357-62.
16. Nilsson G, Lekander M, Åkerstedt T, *et al.* Diurnal variation of circulating interleukin-6 in humans: a meta-analysis. *bioRxiv*. 2016.

- 1  
2  
3 400 17. Gudewill S, Pollmacher T, Vedder H, *et al.* Nocturnal plasma levels of cytokines in  
4 401 healthy men. *European archives of psychiatry and clinical neuroscience.* 1992; 242:  
5 402 53-6.  
6 403 18. Bauer J, Hohagen F, Ebert T, *et al.* Interleukin-6 serum levels in healthy persons  
7 404 correspond to the sleep-wake cycle. *The Clinical investigator.* 1994; 72: 315-.  
8 405 19. Gimeno D, Kivimaki M, Brunner EJ, *et al.* Associations of C-reactive protein and  
9 406 interleukin-6 with cognitive symptoms of depression: 12-year follow-up of the  
10 407 Whitehall II study. *Psychological medicine.* 2009; 39: 413-23.  
11 408 20. Sartini C, Wannamethee SG, Iliffe S, *et al.* Diurnal patterns of objectively measured  
12 409 physical activity and sedentary behaviour in older men. *BMC Public Health.* 2015;  
13 410 15: 609.  
14 411 21. Goetze JP, Jorgensen HL, Sennels HP, *et al.* Diurnal plasma concentrations of  
15 412 natriuretic propeptides in healthy young males. *Clinical chemistry.* 2012; 58: 789-92.  
16 413 22. Eliasson M, Evrin PE, Lundblad D, *et al.* Influence of gender, age and sampling time  
17 414 on plasma fibrinolytic variables and fibrinogen. *Fibrinolysis.* 1993; 7: 316-23.  
18 415 23. Meier-Ewert HK, Ridker PM, Rifai N, *et al.* Absence of diurnal variation of C-  
19 416 reactive protein concentrations in healthy human subjects. *Clinical chemistry.* 2001;  
20 417 47: 426-30.  
21 418 24. Jafri SM, VanRollins M, Ozawa T, *et al.* Circadian variation in platelet function in  
22 419 healthy volunteers. *Am J Cardiol.* 1992; 69: 951-4.  
23 420 25. Bridges AB, McLaren M, Scott NA, *et al.* Circadian variation of tissue plasminogen  
24 421 activator and its inhibitor, von Willebrand factor antigen, and prostacyclin stimulating  
25 422 factor in men with ischaemic heart disease. *British Heart Journal.* 1993; 69: 121-4.  
26 423 26. Klinkenberg LJ, van Dijk JW, Tan FE, *et al.* Circulating cardiac troponin T exhibits a  
27 424 diurnal rhythm. *Journal of the American College of Cardiology.* 2014; 63: 1788-95.  
28 425 27. Bremner WF, Sothorn RB, Kanabrocki EL, *et al.* Relation between circadian patterns  
29 426 in levels of circulating lipoprotein(a), fibrinogen, platelets, and related lipid variables  
30 427 in men. *American heart journal.* 2000; 139: 164-73.  
31 428 28. Kristal-Boneh E, Harari G and Green MS. Seasonal Change in 24-Hour Blood  
32 429 Pressure and Heart Rate Is Greater Among Smokers Than Nonsmokers. *Hypertension.*  
33 430 1997; 30: 436-41.  
34 431 29. Vgontzas AN, Zoumakis M, Bixler EO, *et al.* Impaired nighttime sleep in healthy old  
35 432 versus young adults is associated with elevated plasma interleukin-6 and cortisol  
36 433 levels: physiologic and therapeutic implications. *J Clin Endocrinol Metab.* 2003; 88:  
37 434 2087-95.  
38 435 30. Elliott WJ. Circadian variation in the timing of stroke onset: a meta-analysis. *Stroke;*  
39 436 *a journal of cerebral circulation.* 1998; 29: 992-6.  
40 437 31. Carson PA, O'Connor CM, Miller AB, *et al.* Circadian rhythm and sudden death in  
41 438 heart failure Results from prospective randomized amlodipine survival trial. *Journal of*  
42 439 *the American College of Cardiology.* 2000; 36: 541-6.

440

STROBE Statement—Checklist of items that should be included in reports of *cross-sectional studies*

|                              | Item No | Recommendation                                                                                                                                                                                    |                                                                  |
|------------------------------|---------|---------------------------------------------------------------------------------------------------------------------------------------------------------------------------------------------------|------------------------------------------------------------------|
| <b>Title and abstract</b>    | 1       | (a) Indicate the study's design with a commonly used term in the title or the abstract                                                                                                            | Abstract                                                         |
|                              |         | (b) Provide in the abstract an informative and balanced summary of what was done and what was found                                                                                               | Abstract                                                         |
| <b>Introduction</b>          |         |                                                                                                                                                                                                   |                                                                  |
| Background/rationale         | 2       | Explain the scientific background and rationale for the investigation being reported                                                                                                              | Introduction, lines 66-68                                        |
| Objectives                   | 3       | State specific objectives, including any prespecified hypotheses                                                                                                                                  | Introduction, lines 66-67 72-74                                  |
| <b>Methods</b>               |         |                                                                                                                                                                                                   |                                                                  |
| Study design                 | 4       | Present key elements of study design early in the paper                                                                                                                                           | Methods, line 78-81                                              |
| Setting                      | 5       | Describe the setting, locations, and relevant dates, including periods of recruitment, exposure, follow-up, and data collection                                                                   | Methods, lines 86-93                                             |
| Participants                 | 6       | (a) Give the eligibility criteria, and the sources and methods of selection of participants                                                                                                       | Methods, lines 78-81 and 86-90                                   |
| Variables                    | 7       | Clearly define all outcomes, exposures, predictors, potential confounders, and effect modifiers. Give diagnostic criteria, if applicable                                                          | Methods, lines 104-121                                           |
| Data sources/<br>measurement | 8*      | For each variable of interest, give sources of data and details of methods of assessment (measurement). Describe comparability of assessment methods if there is more than one group              | Methods, lines 91-121                                            |
| Bias                         | 9       | Describe any efforts to address potential sources of bias                                                                                                                                         |                                                                  |
| Study size                   | 10      | Explain how the study size was arrived at                                                                                                                                                         | Results, lines 86-90                                             |
| Quantitative variables       | 11      | Explain how quantitative variables were handled in the analyses. If applicable, describe which groupings were chosen and why                                                                      | Methods, lines 104-121                                           |
| Statistical methods          | 12      | (a) Describe all statistical methods, including those used to control for confounding                                                                                                             | Methods, lines 123-166                                           |
|                              |         | (b) Describe any methods used to examine subgroups and interactions                                                                                                                               | Methods, lines 150-166                                           |
|                              |         | (c) Explain how missing data were addressed                                                                                                                                                       |                                                                  |
|                              |         | (d) If applicable, describe analytical methods taking account of sampling strategy                                                                                                                | NA                                                               |
|                              |         | (e) Describe any sensitivity analyses                                                                                                                                                             | Methods, lines 150-166                                           |
| <b>Results</b>               |         |                                                                                                                                                                                                   |                                                                  |
| Participants                 | 13*     | (a) Report numbers of individuals at each stage of study—eg numbers potentially eligible, examined for eligibility, confirmed eligible, included in the study, completing follow-up, and analysed | Methods, lines 78-81 and 86-90                                   |
|                              |         | (b) Give reasons for non-participation at each stage                                                                                                                                              | Methods, lines 78-81 and 86-90                                   |
|                              |         | (c) Consider use of a flow diagram                                                                                                                                                                | Not necessary for this study, see Methods, lines 78-81 and 86-90 |

|    |                          |     |                                                                                                                                                                                                              |
|----|--------------------------|-----|--------------------------------------------------------------------------------------------------------------------------------------------------------------------------------------------------------------|
| 1  |                          |     |                                                                                                                                                                                                              |
| 2  | Descriptive data         | 14* | (a) Give characteristics of study participants (eg demographic, clinical, social) and information on exposures and potential confounders                                                                     |
| 3  |                          |     | Table 1                                                                                                                                                                                                      |
| 4  |                          |     |                                                                                                                                                                                                              |
| 5  |                          |     |                                                                                                                                                                                                              |
| 6  |                          |     | (b) Indicate number of participants with missing data for each variable of interest                                                                                                                          |
| 7  |                          |     | Table 1                                                                                                                                                                                                      |
| 8  | Outcome data             | 15* | Report numbers of outcome events or summary measures                                                                                                                                                         |
| 9  |                          |     | Table 1, Figure 1                                                                                                                                                                                            |
| 10 | Main results             | 16  | (a) Give unadjusted estimates and, if applicable, confounder-adjusted estimates and their precision (eg, 95% confidence interval). Make clear which confounders were adjusted for and why they were included |
| 11 |                          |     | Table 2                                                                                                                                                                                                      |
| 12 |                          |     |                                                                                                                                                                                                              |
| 13 |                          |     | (b) Report category boundaries when continuous variables were categorized                                                                                                                                    |
| 14 |                          |     | NA                                                                                                                                                                                                           |
| 15 |                          |     |                                                                                                                                                                                                              |
| 16 |                          |     | (c) If relevant, consider translating estimates of relative risk into absolute risk for a meaningful time period                                                                                             |
| 17 |                          |     | NA                                                                                                                                                                                                           |
| 18 |                          |     |                                                                                                                                                                                                              |
| 19 | Other analyses           | 17  | Report other analyses done—eg analyses of subgroups and interactions, and sensitivity analyses                                                                                                               |
| 20 |                          |     | Results, lines 195-216                                                                                                                                                                                       |
| 21 |                          |     |                                                                                                                                                                                                              |
| 22 | <b>Discussion</b>        |     |                                                                                                                                                                                                              |
| 23 | Key results              | 18  | Summarise key results with reference to study objectives                                                                                                                                                     |
| 24 |                          |     | Results, lines 169-180 Discussion, lines 219-230                                                                                                                                                             |
| 25 |                          |     |                                                                                                                                                                                                              |
| 26 |                          |     |                                                                                                                                                                                                              |
| 27 | Limitations              | 19  | Discuss limitations of the study, taking into account sources of potential bias or imprecision. Discuss both direction and magnitude of any potential bias                                                   |
| 28 |                          |     | Discussion, lines 267-279                                                                                                                                                                                    |
| 29 |                          |     |                                                                                                                                                                                                              |
| 30 | Interpretation           | 20  | Give a cautious overall interpretation of results considering objectives, limitations, multiplicity of analyses, results from similar studies, and other relevant evidence                                   |
| 31 |                          |     | Discussion, lines 232-244 and 282 - 292                                                                                                                                                                      |
| 32 |                          |     |                                                                                                                                                                                                              |
| 33 |                          |     |                                                                                                                                                                                                              |
| 34 | Generalisability         | 21  | Discuss the generalisability (external validity) of the study results                                                                                                                                        |
| 35 |                          |     | Discussion, lines 295-297                                                                                                                                                                                    |
| 36 |                          |     |                                                                                                                                                                                                              |
| 37 | <b>Other information</b> |     |                                                                                                                                                                                                              |
| 38 | Funding                  | 22  | Give the source of funding and the role of the funders for the present study and, if applicable, for the original study on which the present article is based                                                |
| 39 |                          |     | Acknowledgements, lines 306-314                                                                                                                                                                              |
| 40 |                          |     |                                                                                                                                                                                                              |
| 41 |                          |     |                                                                                                                                                                                                              |
| 42 |                          |     |                                                                                                                                                                                                              |

\*Give information separately for exposed and unexposed groups.

**Note:** An Explanation and Elaboration article discusses each checklist item and gives methodological background and published examples of transparent reporting. The STROBE checklist is best used in conjunction with this article (freely available on the Web sites of PLoS Medicine at <http://www.plosmedicine.org/>, Annals of Internal Medicine at <http://www.annals.org/>, and Epidemiology at <http://www.epidem.com/>). Information on the STROBE Initiative is available at [www.strobe-statement.org](http://www.strobe-statement.org).

# BMJ Open

## Time of day variations in cardiovascular disease risk factors measured in older men

|                                 |                                                                                                                                                                                                                                                                                                                                                                                                                                                                                                                                                                                                                                                                             |
|---------------------------------|-----------------------------------------------------------------------------------------------------------------------------------------------------------------------------------------------------------------------------------------------------------------------------------------------------------------------------------------------------------------------------------------------------------------------------------------------------------------------------------------------------------------------------------------------------------------------------------------------------------------------------------------------------------------------------|
| Journal:                        | <i>BMJ Open</i>                                                                                                                                                                                                                                                                                                                                                                                                                                                                                                                                                                                                                                                             |
| Manuscript ID                   | bmjopen-2017-018264.R1                                                                                                                                                                                                                                                                                                                                                                                                                                                                                                                                                                                                                                                      |
| Article Type:                   | Research                                                                                                                                                                                                                                                                                                                                                                                                                                                                                                                                                                                                                                                                    |
| Date Submitted by the Author:   | 18-Aug-2017                                                                                                                                                                                                                                                                                                                                                                                                                                                                                                                                                                                                                                                                 |
| Complete List of Authors:       | Sartini, Claudio; University College of London, Primary Care and Population Health<br>Whincup, Peter; St Georges, University of London, Population Health Research Institute<br>Wannamethee, Goya; University College London<br>Jefferis, Barbara ; University College London<br>Lennon, Lucy; UCL, Department of Primary Care and Population Health<br>Lowe, Gordon; University of Glasgow, Institute of Cardiovascular and Medical Sciences<br>Welsh, Paul; University of Glasgow, Institute of Cardiovascular and Medical Sciences<br>Sattar, Naveed; University of Glasgow, BHF centre<br>Morris, Richard; University of Bristol, School of Social & Community Medicine |
| <b>Primary Subject Heading</b>: | Epidemiology                                                                                                                                                                                                                                                                                                                                                                                                                                                                                                                                                                                                                                                                |
| Secondary Subject Heading:      | Public health                                                                                                                                                                                                                                                                                                                                                                                                                                                                                                                                                                                                                                                               |
| Keywords:                       | biological markers, older adults, cardiovascular disease, diurnal variations                                                                                                                                                                                                                                                                                                                                                                                                                                                                                                                                                                                                |
|                                 |                                                                                                                                                                                                                                                                                                                                                                                                                                                                                                                                                                                                                                                                             |

SCHOLARONE™  
Manuscripts

1  
2  
3  
4  
5  
6  
7  
8  
9  
10  
11  
12  
13  
14  
15  
16  
17  
18  
19  
20  
21  
22  
23  
24  
25  
26  
27  
28  
29  
30  
31  
32  
33  
34  
35  
36  
37  
38  
39  
40  
41  
42  
43  
44  
45  
46  
47  
48  
49  
50  
51  
52  
53  
54  
55  
56  
57  
58  
59  
60

1 **Title:** Time of day variations in cardiovascular disease risk factors measured in older men

2 Claudio Sartini, MSc <sup>1\*</sup>, Peter H Whincup, PhD <sup>2</sup>, S Goya Wannamethee, PhD <sup>1</sup>, Barbara J  
3 Jefferis, PhD <sup>1</sup>, Lucy Lennon, MSc <sup>1</sup>, Gordon DO Lowe, PhD <sup>3</sup>, Paul Welsh, PhD <sup>3</sup>, Naveed  
4 Sattar, PhD <sup>3</sup>, and Richard W Morris, PhD <sup>4</sup>

5 <sup>1</sup> Department of Primary Care & Population Health, University College London, Rowland Hill  
6 Street, NW3 2PF, London. UK

7 <sup>2</sup> Population Health Research Institute, St George's University of London, Cranmer Terrace  
8 London SW17 0RE, UK.

9 <sup>3</sup> Institute of Cardiovascular and Medical Sciences, University of Glasgow, Glasgow G12 8TA  
10 UK

11 <sup>4</sup> School of Social & Community Medicine, University of Bristol, Canynge Hall, 39 Whatley Rd,  
12 Bristol BS8 2PS, UK.

13

14 \* Corresponding Author

15 E-mail: [c.sartini@ucl.ac.uk](mailto:c.sartini@ucl.ac.uk);

16

17 **Manuscript number of words:** 4847 words (all included: title page, abstract, manuscript, all  
18 tables and references).

19

1  
2  
3 20 **Abstract (250 words, now 248)**  
4

5 21 **Objective:** We estimated associations of time of day with cardiovascular disease (CVD) risk  
6  
7 22 factors measured in older men.

8  
9 23 **Methods:** CVD risk factors (markers of inflammation and haemostasis, and cardiac markers)  
10  
11 24 were measured on one occasion between 08:00-19:00 hours in 4252 men aged 60-79 years  
12  
13 25 from the British Regional Heart Study. Linear models were used to estimate associations  
14  
15 26 between time of day and risk factors. When an association was found, we examined  
16  
17 27 whether the relationship between risk factors and cardiovascular mortality was affected by  
18  
19 28 the adjustment for time of day using survival analyses.

20 29 **Results:** N-terminal pro-brain natriuretic peptide (NT-ProBNP) levels increased by 3.3% per  
21  
22 30 hour [95% Confidence interval (CI) 1.9; 4.8], Interleukin-6 (IL-6) increased by 2.6% per hour  
23  
24 31 (95% CI 1.8; 3.4), while Tissue plasminogen activator (t-PA) decreased by 3.3% per hour  
25  
26 32 (95% CI 3.7; 2.9); these associations were unaffected by adjustment for possible  
27  
28 33 confounding factors. The percentages of variation in these risk factors attributable to time  
29  
30 34 of day were less than 2%. In survival analyses, the association of IL-6, NT-ProBNP, and t-PA  
31  
32 35 with cardiovascular mortality was not affected by the adjustment for time of day. C-Reactive  
33  
34 36 Protein, Fibrinogen, D-Dimer, von Willebrand Factor, and cardiac Troponin T showed no  
35  
36 37 associations with time of day.

37 38 **Conclusions:** In older men, markers of inflammation (IL-6), haemostasis (t-PA), and a cardiac  
38  
39 39 marker (NT-ProBNP) varied by time of day. The contribution of time of day to variations in  
40  
41 40 these markers was small, and did not appear to be relevant for the CVD risk prediction.  
42  
43  
44  
45  
46  
47  
48  
49  
50  
51  
52  
53  
54  
55  
56  
57  
58  
59  
60



## 42 **Background**

43 Previous studies have reported time of day variation in both established and emerging  
44 cardiovascular disease (CVD) risk factors in middle aged adults, such as blood pressure,  
45 lipids and some well-established inflammatory and haemostatic factors (e.g. white blood  
46 cell, red blood cell, and platelets counts) <sup>1-3</sup>. However, the extent to which emerging CVD  
47 risk factors such as Interleukin-6, a marker of inflammation causally associated with CHD in  
48 a recent study <sup>4</sup>, and N-terminal pro-brain natriuretic peptide, a marker of heart failure <sup>5</sup>  
49 vary by time of day have been less studied. Moreover, very little is known on time of day  
50 variations in other emerging risk factors prospectively associated with CVD (e.g. t-PA, D-  
51 Dimer, von Willebrand factor, and Cardiac Troponin T), although their causal association  
52 with CVD remain debated or not yet tested.

53  
54 We would expect that time of day variations in some emerging CVD risk factors measured in  
55 older adults may occur, consistent with findings in younger populations <sup>6</sup>. However, in older  
56 adults the degree of difference attributable to time of day has not been yet estimated;  
57 establishing its importance and its effects on prediction of CVD risk is important given the  
58 potentially wider use of N-terminal pro-brain natriuretic peptide in risk stratification (as  
59 shown in a recent major meta-analysis in the general population <sup>7</sup>), and potential causal link  
60 between IL-6 and cardiovascular disease <sup>4</sup>. Therefore, the aim of this study was to  
61 investigate how emerging CVD risk factors, including markers of inflammation, haemostasis  
62 and myocardial function, varied by time of day in older British men.

## 64 **Methods**

### 65 *Participants*

66 The British Regional Heart Study (BRHS) is a prospective cohort study of cardiovascular  
67 disease involving 7735 middle aged men (40-59 years) selected in 1978-80 from the age-sex  
68 registers of one local primary care centre in 24 British towns <sup>8</sup>. The 24 towns were selected  
69 to represent the variation in cardiovascular disease across the UK <sup>9</sup>. The National Research  
70 Ethics Service (NRES) Committee for London provided ethical approval. Participants  
71 provided informed written consent to the investigation, which was performed in accordance  
72 with the Declaration of Helsinki <sup>10</sup>.

73

1  
2  
3 74 *Follow-up examination*

4 75 In 1998-2000, an average of 20 years after the initial recruitment, 4252 surviving  
5  
6 76 participants (77% response rate) aged 60-79 years who were resident in the UK attended a  
7  
8 77 physical examination during which nurses took a fasting blood sample on one occasion for  
9  
10 78 each participant. The men were asked to fast for a minimum of 6 hours, during which they  
11  
12 79 were instructed to drink only water, as previously reported <sup>2</sup>. The blood samples were  
13  
14 80 collected between 08:00 h and 19:00 h and then assayed for a range of biochemical and  
15  
16 81 haematological markers. Participants' appointment times were non-systematically  
17  
18 82 allocated. They were offered the opportunity to contact the BRHS team and change the time  
19  
20 83 of examination, if unable to attend; a small proportion of participants did so.  
21

22 84  
23 85 The participants were also asked to complete a questionnaire which included questions on  
24  
25 86 other established CVD risk factors, such as age, social class, smoking habits, alcohol  
26  
27 87 consumption, and physical activity. Specifically, physical activity levels were self-reported <sup>11</sup>  
28  
29 88 and recently validated using accelerometers <sup>12</sup>. Incident CVD, including non-fatal stroke and  
30  
31 89 non-fatal MI were recorded: their definitions have been reported elsewhere <sup>13</sup>. Men were  
32  
33 90 also asked whether a doctor had ever told them that they had heart failure <sup>5</sup>. The number of  
34  
35 91 blood samples collected and included in the analyses differ according to the risk factor  
36  
37 92 measurements (the number of observations varied from 3580 for N-terminal Pro-Brain  
38  
39 93 Natriuretic Peptide to 3863 for von Willebrand Factor in complete case analyses including all  
40  
41 94 covariates of interest).

42

43 96 *CVD Risk factors*

44 97 Circulating levels of markers of inflammation (C-reactive protein [CRP], Interleukin 6 [IL-6],  
45  
46 98 Fibrinogen), cardiac markers (N-terminal pro-brain natriuretic peptide [NT-ProBNP], cardiac  
47  
48 99 Troponin T [cTnT], and markers of haemostasis (tissue plasminogen activator [t-PA] antigen,  
49  
50 100 fibrin D-dimer, von Willebrand factor [vWF]) were measured.

51 101

52 102 D-dimer and t-PA levels were measured using an enzyme-linked immunosorbent assay  
53  
54 103 (ELISA; Biopool AB, Umeå, Sweden), as was VWF antigen (Dako, High Wycombe, UK). C-  
55  
56 104 reactive protein was assayed using ultrasensitive nephelometry (Dade Behring, Milton  
57  
58 105 Keynes, UK). IL-6 was assayed using a high-sensitivity ELISA (R & D Sys-tems, Oxford, UK).

1  
2  
3 106 Fibrinogen was assayed using an auto-mated Clauss assay in a coagulometer (MDA-180,  
4 107 Organon Teknika, Cambridge, UK). NT-proBNP and hsTnT were measured in plasma samples  
5 108 on an automated clinically validated immunoassay analyzer (e411, Roche Diagnostics,  
6 109 Burgess Hill, United Kingdom) using the manufacturers' calibrators and quality control  
7  
8 110 reagents. Intra- and inter-assay Coefficient of Variations (CVs) were, respectively: 4.1% and  
9 111 6.6% for t-PA; 3.2% and 4.2% for vWF; 4.7% and 5.2% for D-dimer; 4.7% and 8.3% for CRP;  
10 112 7.5% and 8.9% for IL-6; 2.6% and 3.7% for Fibrinogen, and 4.4% and 7.7% for NT-ProBNP and  
11 113 cTnT.  
12  
13  
14  
15  
16  
17  
18

19 115 The samples were centrifuged and separated on the morning or afternoon of collection and  
20 116 stored on site at -20°C until they were transferred to a central freezer storage location at -  
21 117 70°C within 2 weeks of sample collection. Samples were then transferred on dry ice to a  
22 118 single central laboratory and were thawed immediately before analysis. Plasma samples  
23 119 were used for all the analyses reported here. The original sample collection took place  
24 120 between January 1998 and March 2000. Most of the analyses described here were carried  
25 121 out during 2000, after a maximum of 3 years storage; NT-ProBNP and cTnT were analysed in  
26 122 2009.  
27  
28  
29  
30  
31  
32  
33  
34

### 35 124 **Statistical methods**

36 125 Firstly, the distributions of the outcomes were examined; the outcomes were log-  
37 126 transformed as the distributions were positively skewed. Therefore, analysis was carried out  
38 127 on their log-transformed values throughout. Unadjusted geometric means and 95%  
39 128 Confidence Intervals [CI] of the outcomes were plotted against hour of the day.  
40  
41  
42  
43  
44

#### 45 130 *Adjusted associations between time of day and the outcomes*

46 131 Associations between time of day (fitted as a continuous variable, range 8-18) and the  
47 132 outcomes were examined using linear multilevel random intercept models (level 1 =  
48 133 individual, level 2 = town of residence). The results can be interpreted as between-person  
49 134 variations over the course of the examination day; the estimates from the linear model  
50 135 were reported as the difference in the outcome levels per hour of sampling over the  
51 136 examination day. As the outcomes were log-transformed, the results were reported as  
52 137 percent difference in the outcome geometric mean per hour of sampling. All models were  
53  
54  
55  
56  
57  
58  
59  
60

1  
2  
3 138 initially adjusted for age only. Next, the models were adjusted for age and other possible  
4  
5 139 confounding factors: social class, BMI, previous stroke or myocardial infarction (MI), physical  
6  
7 140 activity, smoking status, alcohol consumption, use of statin, and a seasonal term (fitted  
8  
9 141 using a cosinor function, as in previous studies)<sup>14</sup>. As NT-ProBNP and cTnT are principally  
10  
11 142 markers of heart failure, the association with time of day was adjusted for previous heart  
12  
13 143 failure.  
14

15  
16 145 When the association of time of the day with the outcomes was found to be statistically  
17  
18 146 significant, the proportion of variance associated with time of the day was estimated using  
19  
20 147 partial R-squared.  
21

22 148

#### 23 149 *Sensitivity analyses*

24  
25 150 Six sensitivity analyses were performed: (i) all models were additionally adjusted for fasting  
26  
27 151 time and diabetes; (ii) all models were carried out excluding men with diabetes, (iii)  
28  
29 152 interactions were fitted to test whether the time of day associations were modified by age  
30  
31 153 (fitted as continuous variable); (iv) as NT-ProBNP and cTnT were acknowledged as specific  
32  
33 154 cardiac markers<sup>5</sup>, interactions were fitted to test whether the time of day associations were  
34  
35 155 modified by previous heart failure (yes/no); (v) to explore the potential of undiagnosed  
36  
37 156 heart failure or cardiac damage influencing findings for NT-ProBNP and cTnT, we repeated  
38  
39 157 regression models after excluding men with NTproBNP > 400 pg/ml; (vi) a quadratic term for  
40  
41 158 time of day was added to the models in order to check for non-linearity  
42

43 159

44  
45 160 As IL-6 has been causally associated with cardiovascular risk<sup>4</sup>, and prospectively associated  
46  
47 161 with CVD mortality in the BRHS sample used here<sup>15</sup>, we investigated the relevance of time  
48  
49 162 of day to the cardiovascular risk prediction by performing two survival analyses: in the first  
50  
51 163 analysis we used Cox models where unadjusted log IL-6 was used as the predictor and CVD  
52  
53 164 mortality as the clinical outcome; then, we repeated the same analysis using log IL-6  
54  
55 165 standardised by the time of day rather than unadjusted log IL-6. For completeness of  
56  
57 166 information, we repeated this sensitivity analysis for NT-ProBNP and t-PA.  
58

59 167

#### 56 168 **Results**

58 169 The characteristics of the study participants (mean age 68.7 years, standard deviation (SD) =  
59  
60

1  
2  
3 170 5.5) are reported in Table 1. The associations between time of day (by hour) and risk factors  
4  
5 171 are shown in Figure 1. Evidence of an increase over the course of the day was particularly  
6  
7 172 noticeable for IL-6, and for NT-ProBNP (Figure 1). Also, levels of t-PA were lower in the  
8  
9 173 afternoon in comparison with morning, while variations by time of day for other risk factors  
10  
11 174 were not clearly observable from the plots (Figure 1). The results of corresponding linear  
12  
13 175 regression analyses are shown in Table 2: statistically significant associations between time  
14  
15 176 of the day and some outcomes were found (Table 2): over the course of the examination  
16  
17 177 day NT-ProBNP levels increased by 3.3% per hour (95% CI 1.9; 4.8%), IL-6 increased by 2.6%  
18  
19 178 per hour (95% CI 1.8; 3.4%). Conversely, t-PA decreased by 3.3% per hour (95% CI 3.7; 2.9%).  
20  
21 179 The proportion of variance associated with time of the day from the fully adjusted models  
22  
23 180 was 0.5%, 1%, and 2% for NT-ProBNP, IL-6, and t-PA respectively.

24  
25 181  
26 182 C-Reactive Protein, Fibrinogen, D-Dimer, von Willebrand Factor, and cardiac Troponin T  
27  
28 183 showed no consistent associations with time of day (Table 2).  
29  
30 184

### 31 185 *Sensitivity analyses*

32  
33 186 Overall, we found that fasting time did not alter the magnitude of associations between  
34  
35 187 time of the day and the outcomes reported in Table 2. Only the association between time of  
36  
37 188 the day and t-PA was strongly attenuated after accounting for fasting time (fitted as  
38  
39 189 continuous variable): the decrease in t-PA levels was -3.3% (95%CI -3.7; -2.9) per hour  
40  
41 190 before the adjustment (Table 2) and -1.4% (95%CI -2.2; -0.1) after the adjustment for  
42  
43 191 fasting. An additional adjustment for diabetes status did not alter the magnitude of the  
44  
45 192 association between hour of the day and the outcomes. We also performed the analysis  
46  
47 193 excluding men with diabetes completely (Table 2 – Model 3), but the association between  
48  
49 194 time of day and the outcomes did not substantially change.

50  
51 195  
52 196 For all outcomes, we also did not find evidence for an interaction between of time of day  
53  
54 197 with age (results not shown).  
55  
56 198

57  
58 199 In stratified analysis, NT-ProBNP levels increased by 3.4% (95% CI 1.9; 4.8%,  $p < 0.001$ ) per  
59  
60 200 hour in older men without heart failure. Although men who previously had heart failure had  
201 increased NT-ProBNP levels, there was no evidence for an interaction between previous

1  
2  
3 202 heart failure with time of the day ( $p=0.954$ ). After excluding 466 men with NTproBNP levels  
4  
5 203  $>400\text{pg/ml}$  (12% of the sample), associations between time of the day measures and  
6  
7 204 NTproBNP remained statistically significant and slightly increased in magnitude (3.9% [95%  
8  
9 205 CI 2.7; 5.1%],  $p<0.001$ ). As reported in the main analysis, no significant associations were  
10  
11 206 found between time of the day and cTnT in stratified analysis.  
12

13  
14 208 When adding a quadratic term to the model, we found a significant improvement in model  
15  
16 209 fit for IL-6 only ( $p=0.030$  for the time of day squared term). The association of time of day  
17  
18 210 with IL-6 appeared to be slightly J-shaped, with a linear increase starting from 11:00 until  
19  
20 211 19:00 hours.  
21

22  
23 213 We examined whether adjustment for hour of day affected the associations between risk  
24  
25 214 factors and CVD mortality. In survival analysis, higher levels of log IL-6 were associated with  
26  
27 215 increased CVD mortality (HR=1.70, 95%CI 1.54; 1.87). Standardising IL-6 by time of the day  
28  
29 216 did not change the relationship (HR=1.71, 95%CI 1.55; 1.88). Also, standardising NT-ProBNP  
30  
31 217 levels by time of the day did not alter the magnitude of the effect on CVD mortality  
32  
33 218 (HR=1.92, 95%CI 1.81; 2.04). Finally, associations of t-PA levels with increased CVD mortality  
34  
35 219 did not change substantially before (HR=1.74, 95%CI 1.45; 2.09) and after standardising  
36  
37 220 (HR=1.77, 95%CI 1.47; 2.14) by time of the day.  
38

39  
40  
41  
42  
43  
44  
45  
46  
47  
48  
49  
50  
51  
52  
53  
54  
55  
56  
57  
58  
59  
60

## 222 Discussion

223 To our knowledge, this is the largest investigation of relationships between time of day and  
224  
225 224 CVD risk factors in older men. After adjusting our analysis for potential confounding factors  
226  
227 225 we demonstrated that some, but not all, CVD risk factors levels varied by time of day. In  
228  
229 226 particular, NT-ProBNP and IL-6 increased linearly over the course of the day. Conversely, a  
230  
231 227 decrease in t-PA was also observed; however, after accounting for fasting time the  
232  
233 228 relationship with time of the day was strongly attenuated (therefore fasting time could  
234  
235 229 partially explain the drop in t-PA levels observed in the afternoon vs morning). Our analyses  
236  
237 230 showed that the contribution of time of the day to the overall variation of NT-ProBNP, IL-6,  
238  
239 231 and t-PA was small and without clinical importance; we observed that time of day did not  
240  
241 232 have a sufficiently strong effect to be taken into account when assessing the impact of IL-6,

1  
2  
3 233 NT-ProBNP, and t-PA on CVD mortality. Lastly, an association of time of day with other risk  
4 234 factors was not observed.

5  
6 235

7  
8 236 Literature on time of day variation in emerging CVD markers of inflammation and  
9 237 haemostasis in older adults is limited; to our knowledge this is the first time these findings  
10 238 have been reported in older adults. Findings from earlier studies of younger adults were  
11 239 fairly consistent with ours. For example a recent meta-analysis of several small studies  
12 240 which analysed IL-6 proposed a diurnal pattern, with overall IL-6 levels increased between  
13 241 08:00 and 19:00 hours as in our study <sup>16</sup>. However, in two previous very small studies of  
14 242 twelve <sup>17</sup> and five <sup>18</sup> participants, IL-6 peaked in the night-time. It is possible that peaks in IL-  
15 243 6 levels may be associated with cognitive symptoms of depression <sup>19</sup> and daily activities,  
16 244 although in the BRHS population this has not yet been investigated. One previous study  
17 245 found that BRHS men were more active in the morning and in early afternoon <sup>20</sup> when the  
18 246 main activities were usually gardening, house works, shopping, or leisure walking. Whether  
19 247 IL-6 was implicated in this daily pattern remains uncertain and can potentially be explored in  
20 248 future studies.

21 249

22 250 Moreover, one previous study reported increased levels of NT-ProBNP over the course of  
23 251 day <sup>21</sup> as we observed in our study. A decrease in t-PA over the examination day was also  
24 252 reported in younger subjects (a 45-year-old UK population of 9377 men and women) <sup>6</sup>;  
25 253 however, t-PA did not vary by time of the day in a previous study large study of 1288  
26 254 healthy 25 to 64-year-old men and women <sup>22</sup>.

27 255

28 256 In comparison to our study, findings regarding CRP, Fibrinogen, D-dimer, vWF and cTnT  
29 257 reported in earlier studies of younger adults were similar: a few previous studies reported  
30 258 that they did not find an association of time of day with CRP <sup>23</sup>, D-dimer <sup>24</sup>, and vWF <sup>25</sup>. In  
31 259 one study, the variation in CRP, Fibrinogen, D-dimer, and vWF attributable to time of day  
32 260 was minimal <sup>6</sup>. Literature on cTnT is scarce: one small previous study of repeated measures  
33 261 in 7 participants with type 2 diabetes reported a decrease in cTnT between 8am and 8pm <sup>26</sup>.

34 262

35 263 Although one previous study suggested that diurnal variations in CVD risk factors could be  
36 264 relevant for cardiovascular risk prediction <sup>6</sup>, a prediction model like the one described in our

1  
2  
3 265 survival analysis was not performed. Our findings suggested the effect of time of the day  
4 266 (from 08:00 h to 19:00 h) is not relevant for the CVD risk assessment. With this sensitivity  
5 267 analysis we wanted to investigate time of day variations beyond simple descriptive diurnal  
6 268 patterns; to our knowledge this is the first time this finding has been reported.  
7  
8  
9

10 269

#### 11 270 *Strengths and limitations*

12 271 The BRHS cohort benefits from using a large scale population-based sample of free-living  
13 272 older men and this increases statistical power and precision of estimates. However, the  
14 273 BRHS comprises male participants, predominantly of white European ethnic origin, so  
15 274 findings may not be generalisable to women and non-white ethnic groups. The CVD risk  
16 275 factors measurements were carried out on one occasion over an extended period of the day  
17 276 (between 08:00 and 19:00 hours), offering only a partial understanding of the variations  
18 277 over the 24 hours<sup>27 28</sup>. Therefore, in this study the relationship of the CVD risk factors to  
19 278 time of day was explored using between-participant variation only. In future studies it may  
20 279 be advantageous to carry out repeated measurement of the risk factors over the 24 hours in  
21 280 order to investigate within-person circadian variations. However, with repeated  
22 281 measurements a possible and genuine diurnal variation may be disrupted and natural  
23 282 sleeping patterns altered (repeated measures are usually taken every 1-2 hours during the  
24 283 night)<sup>29</sup>.  
25  
26  
27  
28  
29  
30  
31  
32  
33  
34  
35  
36  
37  
38  
39

40 284

#### 41 285 *Implications*

42 286 Variations of some CVD factors (in particular IL-6 and NT-ProBNP) over the course of the day  
43 287 were observed, suggesting the role of time of the day as potential confounder during the  
44 288 measurements. However, standardising these biological markers by time of day was not  
45 289 particularly relevant for the cardiovascular risk prediction. Also, other sensitivity analyses  
46 290 (stratified analysis and interaction tests) did not add relevant insights suggesting that time  
47 291 of day variations may be not important for clinical risk stratification in general. Further  
48 292 studies assessing both CVD risk factors levels and clinical outcomes (e.g. fatal or non-fatal  
49 293 CVD events) during 24h are required to demonstrate whether a rapid increase of IL-6 over  
50 294 the day may be relevant to the increased number of CVD events observed in early and late  
51 295 morning<sup>30</sup>, and whether the increased levels of NT-ProBNP over the day are related to the  
52 296 afternoon peak in sudden death following heart failure<sup>31</sup>.  
53  
54  
55  
56  
57  
58  
59  
60



1  
2  
3 2974  
5 298 **Conclusions**6 299 Variations in time of day were associated with variations of some, but not all, CVD risk  
7  
8 300 factors measured in older adults. The contribution of time of the day to the markers' overall  
9  
10 301 variation was small and unlikely to affect the CVD risk prediction or clinical risk stratification.  
11

12 302

13  
14 303 **AUTHORS CONTRIBUTIONS**15 304 CS processed the data, performed statistical analyses, drafted and revised the manuscript,  
16  
17 305 and incorporated revisions of co-authors. PHW, SGW, BJ, and RM contributed to the design  
18  
19 306 of the study and revised the manuscript. LL enrolled participants, and collected data. PHW,  
20  
21 307 RM and SGW raised grant funding. All authors gave an intellectual contribution to the  
22  
23 308 manuscript and approved the final version.24 309 **Acknowledgements**25  
26 310 The BRHS is supported by a British Heart Foundation (BHF) programme grant  
27  
28 311 (RG/13/16/30528). This research was supported by a BHF project grant (PG/13/41/30304)  
29  
30 312 which supported CS. The funders had no role in the design and conduct of the study;  
31  
32 313 collection, management, analysis, and interpretation of the data; preparation, review, or  
33  
34 314 approval of the manuscript; and the decision to submit the manuscript for publication. The  
35  
36 315 views expressed in this publication are those of the author(s) and not necessarily those of  
37  
38 316 the BHF.39 317 **Conflict of interest statement**

40 318 The authors report no relationships that could be construed as a conflict of interest

41  
42 319 **Data Sharing statement**43  
44 320 The collection and management of data over the last 39 years of the BRHS has been made  
45  
46 321 possible through grant funding from UK government agencies and charities. We welcome  
47  
48 322 proposals for collaborative projects and data sharing. For general data sharing enquiries,  
49  
50 323 please contact Lucy Lennon (l.lennon@ucl.ac.uk).  
51  
52  
53  
54  
55  
56  
57  
58  
59  
60

324 **Table 1** –Individual characteristics and risk factors levels in the British Regional Heart Study  
 325 (BRHS) men who attended the examinations in 1998-2000

|                                                   |               |
|---------------------------------------------------|---------------|
| <i>Demographic and background characteristics</i> |               |
| Age (years), mean (Standard Deviation, SD)        | 68.7 (5.5)    |
| Social class (manual)                             |               |
| Manual, n (%)                                     | 2166 (51.1)   |
| Non-Manual, n (%)                                 | 1966 (46.3)   |
| Armed Forces, n (%)                               | 112 (2.6)     |
| <i>Physical health</i>                            |               |
| Body Mass Index, mean (SD)                        | 26.9 (3.7)    |
| Prevalence of stroke/myocardial infarction, n (%) | 153 (3.6)     |
| Prevalence of heart failure, n (%)                | 390 (9.2)     |
| Diabetes, n (%)                                   | 478 (11.2)    |
| <i>Behavioural factors</i>                        |               |
| Smoking                                           |               |
| Never, n (%)                                      | 1233 (29.1)   |
| Ex-smokers, n (%)                                 | 2464 (58.0)   |
| Smokers, n (%)                                    | 548 (12.9)    |
| Alcohol consumption                               |               |
| None, n (%)                                       | 431 (10.3)    |
| Occasional/light, n (%) <sup>1</sup>              | 2949 (70.5)   |
| Moderate/Heavy, n (%) <sup>2</sup>                | 779 (18.6)    |
| Physical activity level                           |               |
| Inactive, n (%)                                   | 471 (11.5)    |
| Occasionally, n (%)                               | 957 (23.4)    |
| Light, n (%)                                      | 767 (18.7)    |
| Moderate, n (%)                                   | 591 (14.4)    |
| Moderate vigorous, n (%)                          | 690 (16.8)    |
| Vigorous, n (%)                                   | 621 (15.1)    |
| <i>CVD risk factor, geometric mean (SD) †</i>     |               |
| CRP, mg/L                                         | 1.74 (3.03)   |
| IL-6, pg/mL                                       | 2.46 (1.94)   |
| Fibrinogen, g/L                                   | 3.19 (1.25)   |
| t-PA, ng/mL                                       | 10.23 (1.50)  |
| vWF, IU/dL                                        | 132.41 (1.40) |
| D-dimer, ng/mL                                    | 84.32 (2.32)  |
| NT-ProBNP, pg/mL                                  | 101.50 (3.32) |
| cTnT, pg/mL                                       | 12.07 (1.64)  |

326 <sup>1</sup> >=1 and <=15 units per week (1 unit is approximately 1 drink, such as one glass of wine)

327 <sup>2</sup> >=16 units per week (1 unit is approximately 1 drink, such as one glass of wine)

328 † Abbreviations: C-Reactive Protein (CRP), Interleukin-6 (IL-6), Fibrinogen, tissue plasminogen activator (t-PA) ,  
 329 von Willebrand factor (vWF), fibrin D-dimer, N-terminal pro-brain natriuretic peptide (NT-ProBNP), and cardiac  
 330 Troponin T (cTnT)

331 **Table 2** – Cross-sectional adjusted associations between time of day (fitted as continuous variable) and cardiovascular disease (CVD) risk  
 332 factors measured in the British Regional Heart Study (BRHS) men (aged 60-79) attending the follow-up year 20 examination in 1998-2000.  
 333 Associations are reported as percent difference in CVD risk factors levels per one hour of sampling over the examination day (08:00-19:00h).  
 334 The statistically significant associations are marked in bold.

| CVD risk factor <sup>†</sup> | Model 1:<br>Age adjusted <sup>1</sup>                                                                  |                  | Model 2:<br>Fully adjusted <sup>2</sup>                                                                |                  | Model 3:<br>Fully adjusted <sup>2</sup> excluding men with diabetes                                    |                  |
|------------------------------|--------------------------------------------------------------------------------------------------------|------------------|--------------------------------------------------------------------------------------------------------|------------------|--------------------------------------------------------------------------------------------------------|------------------|
|                              | Percent difference<br>(95%CI)<br>in the CVD risk factor<br>levels per hour of<br>sampling <sup>3</sup> | p-value          | Percent difference<br>(95%CI)<br>in the CVD risk factor<br>levels per hour of<br>sampling <sup>3</sup> | p-value          | Percent difference<br>(95%CI)<br>in the CVD risk factor<br>levels per hour of<br>sampling <sup>4</sup> | p-value          |
| NT-ProBNP                    | <b>3.5 (2.0;5.0)</b>                                                                                   | <b>&lt;0.001</b> | <b>3.3 (1.9; 4.8)</b>                                                                                  | <b>&lt;0.001</b> | 3.5 (2.0; 5.0)                                                                                         | <b>&lt;0.001</b> |
| IL-6                         | <b>2.6 (1.7;3.4)</b>                                                                                   | <b>&lt;0.001</b> | <b>2.6 (1.8; 3.4)</b>                                                                                  | <b>&lt;0.001</b> | 2.4 (1.6; 3.3)                                                                                         | <b>&lt;0.001</b> |
| t-PA                         | <b>-3.3 (-3.8;-2.9)</b>                                                                                | <b>&lt;0.001</b> | <b>-3.3 (-3.7; -2.9)</b>                                                                               | <b>&lt;0.001</b> | -3.2 (-3.6; -2.7)                                                                                      | <b>&lt;0.001</b> |
| Fibrinogen                   | -0.2 (-0.5;0.0)                                                                                        | 0.088            | -0.2 (-0.5; 0.1)                                                                                       | 0.104            | -0.2 (-0.5; 0.1)                                                                                       | 0.149            |
| cTnT                         | -0.4 (-0.9;0.2)                                                                                        | 0.194            | -0.4 (-1.0; 0.2)                                                                                       | 0.174            | -0.4 (-1.0; 0.2)                                                                                       | 0.165            |
| CRP                          | -1.0 (-2.3;0.4)                                                                                        | 0.151            | -0.9 (-2.2; 0.4)                                                                                       | 0.175            | -0.9 (-2.2; 0.5)                                                                                       | 0.191            |
| vWF                          | -0.2 (-0.6;0.2)                                                                                        | 0.374            | -0.2 (-0.6; 0.2)                                                                                       | 0.380            | -0.1 (-0.5; 0.3)                                                                                       | 0.703            |
| D-Dimer                      | -0.0 (-1.0;1.0)                                                                                        | 0.929            | -0.1 (-1.0; 0.9)                                                                                       | 0.890            | -0.1 (-1.2; 0.9)                                                                                       | 0.801            |

335 <sup>1</sup> Model 1: Two level linear models (level 1 = person, level 2 = town of residence during the BRHS recruitment) adjusted for age. Model 1 used the same number of  
 336 observations of Model 2 (complete case analysis).

337 <sup>2</sup> Model 1 additionally adjusted for social class, Body Mass Index, smoking status, alcohol consumption, physical activity, use of statin, and season. Associations with IL-6, t-  
 338 PA, Fibrinogen, CRP, vWF, and D-Dimer were additionally adjusted for prevalence of stroke/MI, while association of time of the day with NT-ProBNP and cTnT models were  
 339 additionally adjusted for prevalence of heart failure.

340 <sup>3</sup> Model 1 and Model 2 used the same number of observations: 3580 for NT-ProBNP, 3832 for IL-6, 3863 for t-PA, 3861 for Fibrinogen, 3827 for cTnT, 3838 for CRP, 3863 for  
 341 vWF, 3859 for D-Dimer

342 <sup>4</sup> Model 3 number of observations: 3176 for NT-ProBNP, 3398 for IL-6, 3429 for t-PA, 3427 for Fibrinogen, 3398 for cTnT, 3405 for CRP, 3429 for vWF, 3425 for D-Dimer

343 <sup>†</sup> Abbreviations: C-Reactive Protein (CRP), Interleukin-6 (IL-6), Fibrinogen, tissue plasminogen activator (t-PA), von Willebrand factor (vWF), fibrin D-dimer, N-terminal pro-  
 344 brain natriuretic peptide (NT-ProBNP), and cardiac Troponin T (cTnT)

345

## References

1. Pocock SJ, Ashby D, Shaper AG, *et al.* Diurnal variations in serum biochemical and haematological measurements. *Journal of clinical pathology*. 1989; 42: 172-9.
2. Emberson JR, Whincup PH, Walker M, *et al.* Biochemical measures in a population-based study: effect of fasting duration and time of day. *Annals of clinical biochemistry*. 2002; 39: 493-501.
3. Elliott WJ. Circadian variation in blood pressure: Implications for the elderly patient. *American Journal of Hypertension*. 1999; 12: 43S-9S.
4. IL6R Genetics Consortium and Emerging Risk Factors Collaboration. Interleukin-6 receptor pathways in coronary heart disease: a collaborative meta-analysis of 82 studies. *The Lancet*. 2012; 379: 1205-13.
5. Wannamethee SG, Shaper AG, Papacosta O, *et al.* Lung function and airway obstruction: associations with circulating markers of cardiac function and incident heart failure in older men-the British Regional Heart Study. *Thorax*. 2016; 71: 526-34.
6. Rudnicka AR, Rumley A, Lowe GD, *et al.* Diurnal, seasonal, and blood-processing patterns in levels of circulating fibrinogen, fibrin D-dimer, C-reactive protein, tissue plasminogen activator, and von Willebrand factor in a 45-year-old population. *Circulation*. 2007; 115: 996-1003.
7. Natriuretic Peptides Studies Collaboration. Natriuretic peptides and integrated risk assessment for cardiovascular disease: an individual-participant-data meta-analysis. *The lancet Diabetes & endocrinology*. 2016; 4: 840-9.
8. Shaper AG, Pocock SJ, Walker M, *et al.* British Regional Heart Study: cardiovascular risk factors in middle-aged men in 24 towns. *BMJ*. 1981; 283: 179-86.
9. Pocock SJ, Shaper AG, Cook DG, *et al.* British Regional Heart Study: geographic variations in cardiovascular mortality, and the role of water quality. *British Medical Journal*. 1980; 280: 1243-9.
10. Declaration of Helsinki - Ethical Principles for Medical Research Involving Human Subjects. *WMA Declaration of Helsinki*. WMA Declaration of Helsinki October 2013.
11. Wannamethee G and Shaper AG. Physical activity and stroke in British middle aged men. *BMJ : British Medical Journal*. 1992; 304: 597-601.
12. Jefferis BJ, Sartini C, Ash S, *et al.* Validity of questionnaire-based assessment of sedentary behaviour and physical activity in a population-based cohort of older men; comparisons with objectively measured physical activity data. *Int J Behav Nutr Phys Act*. 2016; 13: 14.
13. Sartini C, Barry SJ, Wannamethee SG, *et al.* Effect of cold spells and their modifiers on cardiovascular disease events: Evidence from two prospective studies. *Int J Cardiol*. 2016; 218: 275-83.
14. Stolwijk AM, Straatman H and Zielhuis GA. Studying seasonality by using sine and cosine functions in regression analysis. *Journal of Epidemiology and Community Health*. 1999; 53: 235-8.
15. Wannamethee SG, Whincup PH, Lennon L, *et al.* Associations Between Fibrin D-Dimer, Markers of Inflammation, Incident Self-Reported Mobility Limitation, and All-Cause Mortality in Older Men. *Journal of the American Geriatrics Society*. 2014; 62: 2357-62.
16. Nilsson G, Lekander M, Åkerstedt T, *et al.* Diurnal variation of circulating interleukin-6 in humans: a meta-analysis. *bioRxiv*. 2016.

- 1  
2  
3 392 17. Gudewill S, Pollmacher T, Vedder H, *et al.* Nocturnal plasma levels of cytokines in  
4 393 healthy men. *European archives of psychiatry and clinical neuroscience.* 1992; 242:  
5 394 53-6.  
6 395 18. Bauer J, Hohagen F, Ebert T, *et al.* Interleukin-6 serum levels in healthy persons  
7 396 correspond to the sleep-wake cycle. *The Clinical investigator.* 1994; 72: 315-  
8 397 19. Gimeno D, Kivimaki M, Brunner EJ, *et al.* Associations of C-reactive protein and  
9 398 interleukin-6 with cognitive symptoms of depression: 12-year follow-up of the  
10 399 Whitehall II study. *Psychological medicine.* 2009; 39: 413-23.  
11 400 20. Sartini C, Wannamethee SG, Iliffe S, *et al.* Diurnal patterns of objectively measured  
12 401 physical activity and sedentary behaviour in older men. *BMC Public Health.* 2015;  
13 402 15: 609.  
14 403 21. Goetze JP, Jorgensen HL, Sennels HP, *et al.* Diurnal plasma concentrations of  
15 404 natriuretic propeptides in healthy young males. *Clinical chemistry.* 2012; 58: 789-92.  
16 405 22. Eliasson M, Evrin PE, Lundblad D, *et al.* Influence of gender, age and sampling time  
17 406 on plasma fibrinolytic variables and fibrinogen. *Fibrinolysis.* 1993; 7: 316-23.  
18 407 23. Meier-Ewert HK, Ridker PM, Rifai N, *et al.* Absence of diurnal variation of C-  
19 408 reactive protein concentrations in healthy human subjects. *Clinical chemistry.* 2001;  
20 409 47: 426-30.  
21 410 24. Jafri SM, VanRollins M, Ozawa T, *et al.* Circadian variation in platelet function in  
22 411 healthy volunteers. *Am J Cardiol.* 1992; 69: 951-4.  
23 412 25. Bridges AB, McLaren M, Scott NA, *et al.* Circadian variation of tissue plasminogen  
24 413 activator and its inhibitor, von Willebrand factor antigen, and prostacyclin stimulating  
25 414 factor in men with ischaemic heart disease. *British Heart Journal.* 1993; 69: 121-4.  
26 415 26. Klinkenberg LJ, van Dijk JW, Tan FE, *et al.* Circulating cardiac troponin T exhibits a  
27 416 diurnal rhythm. *Journal of the American College of Cardiology.* 2014; 63: 1788-95.  
28 417 27. Bremner WF, Sothorn RB, Kanabrocki EL, *et al.* Relation between circadian patterns  
29 418 in levels of circulating lipoprotein(a), fibrinogen, platelets, and related lipid variables  
30 419 in men. *American heart journal.* 2000; 139: 164-73.  
31 420 28. Kristal-Boneh E, Harari G and Green MS. Seasonal Change in 24-Hour Blood  
32 421 Pressure and Heart Rate Is Greater Among Smokers Than Nonsmokers. *Hypertension.*  
33 422 1997; 30: 436-41.  
34 423 29. Vgontzas AN, Zoumakis M, Bixler EO, *et al.* Impaired nighttime sleep in healthy old  
35 424 versus young adults is associated with elevated plasma interleukin-6 and cortisol  
36 425 levels: physiologic and therapeutic implications. *J Clin Endocrinol Metab.* 2003; 88:  
37 426 2087-95.  
38 427 30. Elliott WJ. Circadian variation in the timing of stroke onset: a meta-analysis. *Stroke;*  
39 428 *a journal of cerebral circulation.* 1998; 29: 992-6.  
40 429 31. Carson PA, O'Connor CM, Miller AB, *et al.* Circadian rhythm and sudden death in  
41 430 heart failure Results from prospective randomized amlodipine survival trial. *Journal of*  
42 431 *the American College of Cardiology.* 2000; 36: 541-6.

432

1  
2  
3 433 **Figure 1** – Unadjusted geometric means (95% CI) by time of the day<sup>1</sup> for C-Reactive Protein (CRP), Interleukin-6  
4 434 (IL-6), Fibrinogen, tissue plasminogen activator (t-PA), von Willebrand factor (vWF), fibrin D-dimer, N-terminal  
5 435 pro-brain natriuretic peptide (NT-ProBNP), and cardiac Troponin T (cTnT) measured on one occasion in BRHS  
6 436 men aged 60-79 during the years 1998-2000.  
7 437

8  
9 438  
10 439 <sup>1</sup>Total number of men examined per hour was 33(0.7%) at 08:00-08:59, 363(8.5%) at 8:00-9:59h, 699(16%) at  
11 440 10:00-10:59h, 771(18%) at 11:00-11:59h, 591(14%) at 12:00-12:59h, 99(2%) at 13:00-13:59h, 306(7%) at  
12 441 14:00-14:59), 560(13%) at 15:00-15:59h, 566(13%) at 16:00-16:59, 260(6%) at 17:00-17:59, and 3(<0.1%) at  
13 442 18:00-18:59  
14

15 443  
16  
17  
18  
19  
20  
21  
22  
23  
24  
25  
26  
27  
28  
29  
30  
31  
32  
33  
34  
35  
36  
37  
38  
39  
40  
41  
42  
43  
44  
45  
46  
47  
48  
49  
50  
51  
52  
53  
54  
55  
56  
57  
58  
59  
60

1  
2  
3  
4  
5  
6  
7  
8  
9  
10  
11  
12  
13  
14  
15  
16  
17  
18  
19  
20  
21  
22  
23  
24  
25  
26  
27  
28  
29  
30  
31  
32  
33  
34  
35  
36  
37  
38  
39  
40  
41  
42  
43  
44  
45  
46  
47  
48  
49  
50  
51  
52  
53  
54  
55  
56  
57  
58  
59  
60

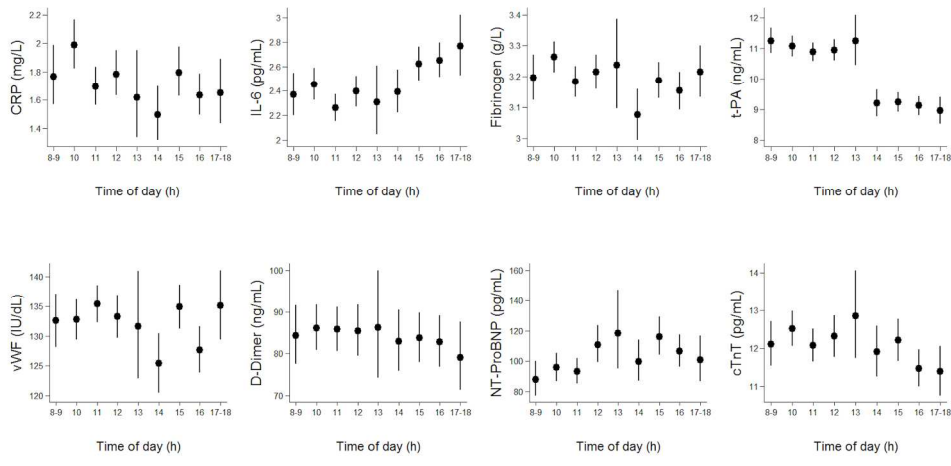

Figure 1 – Unadjusted geometric means (95% CI) by time of the day

186x99mm (300 x 300 DPI)

review only

STROBE Statement—Checklist of items that should be included in reports of *cross-sectional studies*

|                              | Item No | Recommendation                                                                                                                                                                                    |                                                                  |
|------------------------------|---------|---------------------------------------------------------------------------------------------------------------------------------------------------------------------------------------------------|------------------------------------------------------------------|
| <b>Title and abstract</b>    | 1       | (a) Indicate the study's design with a commonly used term in the title or the abstract                                                                                                            | Abstract                                                         |
|                              |         | (b) Provide in the abstract an informative and balanced summary of what was done and what was found                                                                                               | Abstract                                                         |
| <b>Introduction</b>          |         |                                                                                                                                                                                                   |                                                                  |
| Background/rationale         | 2       | Explain the scientific background and rationale for the investigation being reported                                                                                                              | Introduction, lines 54-62                                        |
| Objectives                   | 3       | State specific objectives, including any prespecified hypotheses                                                                                                                                  | Introduction, lines 54-56 and 60-62                              |
| <b>Methods</b>               |         |                                                                                                                                                                                                   |                                                                  |
| Study design                 | 4       | Present key elements of study design early in the paper                                                                                                                                           | Methods, line 66-72                                              |
| Setting                      | 5       | Describe the setting, locations, and relevant dates, including periods of recruitment, exposure, follow-up, and data collection                                                                   | Methods, lines 75-84                                             |
| Participants                 | 6       | (a) Give the eligibility criteria, and the sources and methods of selection of participants                                                                                                       | Methods, lines 66-72 and 75-84                                   |
| Variables                    | 7       | Clearly define all outcomes, exposures, predictors, potential confounders, and effect modifiers. Give diagnostic criteria, if applicable                                                          | Methods, lines 97-123                                            |
| Data sources/<br>measurement | 8*      | For each variable of interest, give sources of data and details of methods of assessment (measurement). Describe comparability of assessment methods if there is more than one group              | Methods, lines 75-123                                            |
| Bias                         | 9       | Describe any efforts to address potential sources of bias                                                                                                                                         |                                                                  |
| Study size                   | 10      | Explain how the study size was arrived at                                                                                                                                                         | Results, lines 75-78                                             |
| Quantitative variables       | 11      | Explain how quantitative variables were handled in the analyses. If applicable, describe which groupings were chosen and why                                                                      | Methods, lines 91-114                                            |
| Statistical methods          | 12      | (a) Describe all statistical methods, including those used to control for confounding                                                                                                             | Methods, lines 125-159                                           |
|                              |         | (b) Describe any methods used to examine subgroups and interactions                                                                                                                               | Methods, lines 152 and 156-158                                   |
|                              |         | (c) Explain how missing data were addressed                                                                                                                                                       |                                                                  |
|                              |         | (d) If applicable, describe analytical methods taking account of sampling strategy                                                                                                                | NA                                                               |
|                              |         | (e) Describe any sensitivity analyses                                                                                                                                                             | Methods, lines 151-159                                           |
| <b>Results</b>               |         |                                                                                                                                                                                                   |                                                                  |
| Participants                 | 13*     | (a) Report numbers of individuals at each stage of study—eg numbers potentially eligible, examined for eligibility, confirmed eligible, included in the study, completing follow-up, and analysed | Methods, lines 66-68 and 91-95                                   |
|                              |         | (b) Give reasons for non-participation at each stage                                                                                                                                              | Methods, lines 66-76                                             |
|                              |         | (c) Consider use of a flow diagram                                                                                                                                                                | Not necessary for this study, see Methods, lines 66-68 and 91-95 |



|    |                          |     |                                                                                                                                                                                                              |
|----|--------------------------|-----|--------------------------------------------------------------------------------------------------------------------------------------------------------------------------------------------------------------|
| 1  |                          |     |                                                                                                                                                                                                              |
| 2  | Descriptive data         | 14* | (a) Give characteristics of study participants (eg demographic, clinical, social) and information on exposures and potential confounders                                                                     |
| 3  |                          |     | Table 1                                                                                                                                                                                                      |
| 4  |                          |     |                                                                                                                                                                                                              |
| 5  |                          |     |                                                                                                                                                                                                              |
| 6  |                          |     | (b) Indicate number of participants with missing data for each variable of interest                                                                                                                          |
| 7  |                          |     | Table 1                                                                                                                                                                                                      |
| 8  | Outcome data             | 15* | Report numbers of outcome events or summary measures                                                                                                                                                         |
| 9  |                          |     | Table 1, Figure 1                                                                                                                                                                                            |
| 10 | Main results             | 16  | (a) Give unadjusted estimates and, if applicable, confounder-adjusted estimates and their precision (eg, 95% confidence interval). Make clear which confounders were adjusted for and why they were included |
| 11 |                          |     | Table 2                                                                                                                                                                                                      |
| 12 |                          |     |                                                                                                                                                                                                              |
| 13 |                          |     | (b) Report category boundaries when continuous variables were categorized                                                                                                                                    |
| 14 |                          |     | NA                                                                                                                                                                                                           |
| 15 |                          |     |                                                                                                                                                                                                              |
| 16 |                          |     | (c) If relevant, consider translating estimates of relative risk into absolute risk for a meaningful time period                                                                                             |
| 17 |                          |     | NA                                                                                                                                                                                                           |
| 18 |                          |     |                                                                                                                                                                                                              |
| 19 | Other analyses           | 17  | Report other analyses done—eg analyses of subgroups and interactions, and sensitivity analyses                                                                                                               |
| 20 |                          |     | Results, lines 187-195                                                                                                                                                                                       |
| 21 |                          |     |                                                                                                                                                                                                              |
| 22 | <b>Discussion</b>        |     |                                                                                                                                                                                                              |
| 23 | Key results              | 18  | Summarise key results with reference to study objectives                                                                                                                                                     |
| 24 |                          |     | Results, lines 170-181 Discussion, lines 224-235                                                                                                                                                             |
| 25 |                          |     |                                                                                                                                                                                                              |
| 26 |                          |     |                                                                                                                                                                                                              |
| 27 | Limitations              | 19  | Discuss limitations of the study, taking into account sources of potential bias or imprecision. Discuss both direction and magnitude of any potential bias                                                   |
| 28 |                          |     | Discussion, lines 272-284                                                                                                                                                                                    |
| 29 |                          |     |                                                                                                                                                                                                              |
| 30 | Interpretation           | 20  | Give a cautious overall interpretation of results considering objectives, limitations, multiplicity of analyses, results from similar studies, and other relevant evidence                                   |
| 31 |                          |     | Discussion, lines 230-234 and 272 - 284                                                                                                                                                                      |
| 32 |                          |     |                                                                                                                                                                                                              |
| 33 |                          |     |                                                                                                                                                                                                              |
| 34 | Generalisability         | 21  | Discuss the generalisability (external validity) of the study results                                                                                                                                        |
| 35 |                          |     | Discussion, lines 287-289                                                                                                                                                                                    |
| 36 |                          |     |                                                                                                                                                                                                              |
| 37 | <b>Other information</b> |     |                                                                                                                                                                                                              |
| 38 | Funding                  | 22  | Give the source of funding and the role of the funders for the present study and, if applicable, for the original study on which the present article is based                                                |
| 39 |                          |     | Acknowledgements, lines 287-302                                                                                                                                                                              |
| 40 |                          |     |                                                                                                                                                                                                              |
| 41 |                          |     |                                                                                                                                                                                                              |
| 42 |                          |     |                                                                                                                                                                                                              |

\*Give information separately for exposed and unexposed groups.

**Note:** An Explanation and Elaboration article discusses each checklist item and gives methodological background and published examples of transparent reporting. The STROBE checklist is best used in conjunction with this article (freely available on the Web sites of PLoS Medicine at <http://www.plosmedicine.org/>, Annals of Internal Medicine at <http://www.annals.org/>, and Epidemiology at <http://www.epidem.com/>). Information on the STROBE Initiative is available at [www.strobe-statement.org](http://www.strobe-statement.org).

# BMJ Open

## Associations of time of day with cardiovascular disease risk factors measured in older men: results from the British Regional Heart Study

|                                 |                                                                                                                                                                                                                                                                                                                                                                                                                                                                                                                                                                                                                                                                             |
|---------------------------------|-----------------------------------------------------------------------------------------------------------------------------------------------------------------------------------------------------------------------------------------------------------------------------------------------------------------------------------------------------------------------------------------------------------------------------------------------------------------------------------------------------------------------------------------------------------------------------------------------------------------------------------------------------------------------------|
| Journal:                        | <i>BMJ Open</i>                                                                                                                                                                                                                                                                                                                                                                                                                                                                                                                                                                                                                                                             |
| Manuscript ID                   | bmjopen-2017-018264.R2                                                                                                                                                                                                                                                                                                                                                                                                                                                                                                                                                                                                                                                      |
| Article Type:                   | Research                                                                                                                                                                                                                                                                                                                                                                                                                                                                                                                                                                                                                                                                    |
| Date Submitted by the Author:   | 25-Aug-2017                                                                                                                                                                                                                                                                                                                                                                                                                                                                                                                                                                                                                                                                 |
| Complete List of Authors:       | Sartini, Claudio; University College of London, Primary Care and Population Health<br>Whincup, Peter; St Georges, University of London, Population Health Research Institute<br>Wannamethee, Goya; University College London<br>Jefferis, Barbara ; University College London<br>Lennon, Lucy; UCL, Department of Primary Care and Population Health<br>Lowe, Gordon; University of Glasgow, Institute of Cardiovascular and Medical Sciences<br>Welsh, Paul; University of Glasgow, Institute of Cardiovascular and Medical Sciences<br>Sattar, Naveed; University of Glasgow, BHF centre<br>Morris, Richard; University of Bristol, School of Social & Community Medicine |
| <b>Primary Subject Heading</b>: | Epidemiology                                                                                                                                                                                                                                                                                                                                                                                                                                                                                                                                                                                                                                                                |
| Secondary Subject Heading:      | Public health                                                                                                                                                                                                                                                                                                                                                                                                                                                                                                                                                                                                                                                               |
| Keywords:                       | biological markers, older adults, cardiovascular disease, diurnal variations                                                                                                                                                                                                                                                                                                                                                                                                                                                                                                                                                                                                |
|                                 |                                                                                                                                                                                                                                                                                                                                                                                                                                                                                                                                                                                                                                                                             |

SCHOLARONE™  
Manuscripts

1  
2  
3  
4  
5  
6  
7  
8  
9  
10  
11  
12  
13  
14  
15  
16  
17  
18  
19  
20  
21  
22  
23  
24  
25  
26  
27  
28  
29  
30  
31  
32  
33  
34  
35  
36  
37  
38  
39  
40  
41  
42  
43  
44  
45  
46  
47  
48  
49  
50  
51  
52  
53  
54  
55  
56  
57  
58  
59  
60

1 **Title:** Associations of time of day with cardiovascular disease risk factors measured in older  
2 men: results from the British Regional Heart Study

3  
4 Claudio Sartini, MSc <sup>1</sup>\*, Peter H Whincup, PhD <sup>2</sup>, S Goya Wannamethee, PhD <sup>1</sup>, Barbara J  
5 Jefferis, PhD <sup>1</sup>, Lucy Lennon, MSc <sup>1</sup>, Gordon DO Lowe, PhD <sup>3</sup>, Paul Welsh, PhD <sup>3</sup>, Naveed  
6 Sattar, PhD <sup>3</sup>, and Richard W Morris, PhD <sup>4</sup>

7 <sup>1</sup>Department of Primary Care & Population Health, University College London, Rowland Hill  
8 Street, NW3 2PF, London. UK

9 <sup>2</sup>Population Health Research Institute, St George's University of London, Cranmer Terrace  
10 London SW17 0RE, UK.

11 <sup>3</sup>Institute of Cardiovascular and Medical Sciences, University of Glasgow, Glasgow G12 8TA  
12 UK

13 <sup>4</sup>School of Social & Community Medicine, University of Bristol, Canynge Hall, 39 Whatley Rd,  
14 Bristol BS8 2PS, UK.

15  
16 \* Corresponding Author

17 E-mail: [c.sartini@ucl.ac.uk](mailto:c.sartini@ucl.ac.uk);

18

19 **Manuscript number of words:** 4847 words (all included: title page, abstract, manuscript, all  
20 tables and references).

1  
2  
3 21 **Abstract (250 words, now 248)**  
4

5 22 **Objective:** We estimated associations of time of day with cardiovascular disease (CVD) risk  
6  
7 23 factors measured in older men.

8  
9 24 **Methods:** CVD risk factors (markers of inflammation and haemostasis, and cardiac markers)  
10  
11 25 were measured on one occasion between 08:00-19:00 hours in 4252 men aged 60-79 years  
12  
13 26 from the British Regional Heart Study. Linear models were used to estimate associations  
14  
15 27 between time of day and risk factors. When an association was found, we examined  
16  
17 28 whether the relationship between risk factors and cardiovascular mortality was affected by  
18  
19 29 the adjustment for time of day using survival analyses.

20 30 **Results:** N-terminal pro-brain natriuretic peptide (NT-ProBNP) levels increased by 3.3% per  
21  
22 31 hour [95% Confidence interval (CI) 1.9; 4.8], Interleukin-6 (IL-6) increased by 2.6% per hour  
23  
24 32 (95% CI 1.8; 3.4), while Tissue plasminogen activator (t-PA) decreased by 3.3% per hour  
25  
26 33 (95% CI 3.7; 2.9); these associations were unaffected by adjustment for possible  
27  
28 34 confounding factors. The percentages of variation in these risk factors attributable to time  
29  
30 35 of day were less than 2%. In survival analyses, the association of IL-6, NT-ProBNP, and t-PA  
31  
32 36 with cardiovascular mortality was not affected by the adjustment for time of day. C-Reactive  
33  
34 37 Protein, Fibrinogen, D-Dimer, von Willebrand Factor, and cardiac Troponin T showed no  
35  
36 38 associations with time of day.

37 39 **Conclusions:** In older men, markers of inflammation (IL-6), haemostasis (t-PA), and a cardiac  
38  
39 40 marker (NT-ProBNP) varied by time of day. The contribution of time of day to variations in  
40  
41 41 these markers was small, and did not appear to be relevant for the CVD risk prediction.  
42

## 43 **Background**

44 Previous studies have reported time of day variation in both established and emerging  
45 cardiovascular disease (CVD) risk factors in middle aged adults, such as blood pressure,  
46 lipids and some well-established inflammatory and haemostatic factors (e.g. white blood  
47 cell, red blood cell, and platelets counts) <sup>1-3</sup>. However, the extent to which emerging CVD  
48 risk factors such as Interleukin-6, a marker of inflammation causally associated with CHD in  
49 a recent study <sup>4</sup>, and N-terminal pro-brain natriuretic peptide, a marker of heart failure <sup>5</sup>  
50 vary by time of day have been less studied. Moreover, very little is known on time of day  
51 variations in other emerging risk factors prospectively associated with CVD (e.g. t-PA, D-  
52 Dimer, von Willebrand factor, and Cardiac Troponin T), although their causal association  
53 with CVD remain debated or not yet tested.

54  
55 We would expect that time of day variations in some emerging CVD risk factors measured in  
56 older adults may occur, consistent with findings in younger populations <sup>6</sup>. However, in older  
57 adults the degree of difference attributable to time of day has not been yet estimated;  
58 establishing its importance and its effects on prediction of CVD risk is important given the  
59 potentially wider use of N-terminal pro-brain natriuretic peptide in risk stratification (as  
60 shown in a recent major meta-analysis in the general population <sup>7</sup>), and potential causal link  
61 between IL-6 and cardiovascular disease <sup>4</sup>. Therefore, the aim of this study was to  
62 investigate how emerging CVD risk factors, including markers of inflammation, haemostasis  
63 and myocardial function, varied by time of day in older British men.

## 65 **Methods**

### 66 *Participants*

67 The British Regional Heart Study (BRHS) is a prospective cohort study of cardiovascular  
68 disease involving 7735 middle aged men (40-59 years) selected in 1978-80 from the age-sex  
69 registers of one local primary care centre in 24 British towns <sup>8</sup>. The 24 towns were selected  
70 to represent the variation in cardiovascular disease across the UK <sup>9</sup>. The National Research  
71 Ethics Service (NRES) Committee for London provided ethical approval. Participants  
72 provided informed written consent to the investigation, which was performed in accordance  
73 with the Declaration of Helsinki <sup>10</sup>.

74

1  
2  
3 75 *Follow-up examination*

4 76 In 1998-2000, an average of 20 years after the initial recruitment, 4252 surviving  
5  
6 77 participants (77% response rate) aged 60-79 years who were resident in the UK attended a  
7  
8 78 physical examination during which nurses took a fasting blood sample on one occasion for  
9  
10 79 each participant. The men were asked to fast for a minimum of 6 hours, during which they  
11  
12 80 were instructed to drink only water, as previously reported <sup>2</sup>. The blood samples were  
13  
14 81 collected between 08:00 h and 19:00 h and then assayed for a range of biochemical and  
15  
16 82 haematological markers. Participants' appointment times were non-systematically  
17  
18 83 allocated. They were offered the opportunity to contact the BRHS team and change the time  
19  
20 84 of examination, if unable to attend; a small proportion of participants did so.  
21

22 85  
23 86 The participants were also asked to complete a questionnaire which included questions on  
24  
25 87 other established CVD risk factors, such as age, social class, smoking habits, alcohol  
26  
27 88 consumption, and physical activity. Specifically, physical activity levels were self-reported <sup>11</sup>  
28  
29 89 and recently validated using accelerometers <sup>12</sup>. Incident CVD, including non-fatal stroke and  
30  
31 90 non-fatal MI were recorded: their definitions have been reported elsewhere <sup>13</sup>. Men were  
32  
33 91 also asked whether a doctor had ever told them that they had heart failure <sup>5</sup>. The number of  
34  
35 92 blood samples collected and included in the analyses differ according to the risk factor  
36  
37 93 measurements (the number of observations varied from 3580 for N-terminal Pro-Brain  
38  
39 94 Natriuretic Peptide to 3863 for von Willebrand Factor in complete case analyses including all  
40  
41 95 covariates of interest).  
42

43 96

44 97 *CVD Risk factors*

45 98 Circulating levels of markers of inflammation (C-reactive protein [CRP], Interleukin 6 [IL-6],  
46  
47 99 Fibrinogen), cardiac markers (N-terminal pro-brain natriuretic peptide [NT-ProBNP], cardiac  
48  
49 100 Troponin T [cTnT], and markers of haemostasis (tissue plasminogen activator [t-PA] antigen,  
50  
51 101 fibrin D-dimer, von Willebrand factor [vWF]) were measured.

52 102

53 103 D-dimer and t-PA levels were measured using an enzyme-linked immunosorbent assay  
54  
55 104 (ELISA; Biopool AB, Umeå, Sweden), as was VWF antigen (Dako, High Wycombe, UK). C-  
56  
57 105 reactive protein was assayed using ultrasensitive nephelometry (Dade Behring, Milton  
58  
59 106 Keynes, UK). IL-6 was assayed using a high-sensitivity ELISA (R & D Systems, Oxford, UK).  
60

1  
2  
3 107 Fibrinogen was assayed using an auto-mated Clauss assay in a coagulometer (MDA-180,  
4 108 Organon Teknika, Cambridge, UK). NT-proBNP and hsTnT were measured in plasma samples  
5 109 on an automated clinically validated immunoassay analyzer (e411, Roche Diagnostics,  
6 110 Burgess Hill, United Kingdom) using the manufacturers' calibrators and quality control  
7  
8 111 reagents. Intra- and inter-assay Coefficient of Variations (CVs) were, respectively: 4.1% and  
9 112 6.6% for t-PA; 3.2% and 4.2% for vWF; 4.7% and 5.2% for D-dimer; 4.7% and 8.3% for CRP;  
10 113 7.5% and 8.9% for IL-6; 2.6% and 3.7% for Fibrinogen, and 4.4% and 7.7% for NT-ProBNP and  
11 114 cTnT.

12  
13  
14  
15  
16  
17  
18  
19  
20  
21  
22  
23  
24  
25  
26  
27  
28  
29  
30  
31  
32  
33  
34

115  
116 The samples were centrifuged and separated on the morning or afternoon of collection and  
117 stored on site at -20°C until they were transferred to a central freezer storage location at -  
118 70°C within 2 weeks of sample collection. Samples were then transferred on dry ice to a  
119 single central laboratory and were thawed immediately before analysis. Plasma samples  
120 were used for all the analyses reported here. The original sample collection took place  
121 between January 1998 and March 2000. Most of the analyses described here were carried  
122 out during 2000, after a maximum of 3 years storage; NT-ProBNP and cTnT were analysed in  
123 2009.

124

### 125 **Statistical methods**

126 Firstly, the distributions of the outcomes were examined; the outcomes were log-  
127 transformed as the distributions were positively skewed. Therefore, analysis was carried out  
128 on their log-transformed values throughout. Unadjusted geometric means and 95%  
129 Confidence Intervals [CI] of the outcomes were plotted against hour of the day.

130

#### 131 *Adjusted associations between time of day and the outcomes*

132 Associations between time of day (fitted as a continuous variable, range 8-18) and the  
133 outcomes were examined using linear multilevel random intercept models (level 1 =  
134 individual, level 2 = town of residence). The results can be interpreted as between-person  
135 variations over the course of the examination day; the estimates from the linear model  
136 were reported as the difference in the outcome levels per hour of sampling over the  
137 examination day. As the outcomes were log-transformed, the results were reported as  
138 percent difference in the outcome geometric mean per hour of sampling. All models were

1  
2  
3 139 initially adjusted for age only. Next, the models were adjusted for age and other possible  
4  
5 140 confounding factors: social class, BMI, previous stroke or myocardial infarction (MI), physical  
6  
7 141 activity, smoking status, alcohol consumption, use of statin, and a seasonal term (fitted  
8  
9 142 using a cosinor function, as in previous studies)<sup>14</sup>. As NT-ProBNP and cTnT are principally  
10  
11 143 markers of heart failure, the association with time of day was adjusted for previous heart  
12  
13 144 failure.  
14

15  
16 146 When the association of time of the day with the outcomes was found to be statistically  
17  
18 147 significant, the proportion of variance associated with time of the day was estimated using  
19  
20 148 partial R-squared.  
21

22 149

### 23 150 *Sensitivity analyses*

24 151 Six sensitivity analyses were performed: (i) all models were additionally adjusted for fasting  
25  
26 152 time and diabetes; (ii) all models were carried out excluding men with diabetes, (iii)  
27  
28 153 interactions were fitted to test whether the time of day associations were modified by age  
29  
30 154 (fitted as continuous variable); (iv) as NT-ProBNP and cTnT were acknowledged as specific  
31  
32 155 cardiac markers<sup>5</sup>, interactions were fitted to test whether the time of day associations were  
33  
34 156 modified by previous heart failure (yes/no); (v) to explore the potential of undiagnosed  
35  
36 157 heart failure or cardiac damage influencing findings for NT-ProBNP and cTnT, we repeated  
37  
38 158 regression models after excluding men with NTproBNP > 400 pg/ml; (vi) a quadratic term for  
39  
40 159 time of day was added to the models in order to check for non-linearity  
41

42 160

43 161 As IL-6 has been causally associated with cardiovascular risk<sup>4</sup>, and prospectively associated  
44  
45 162 with CVD mortality in the BRHS sample used here<sup>15</sup>, we investigated the relevance of time  
46  
47 163 of day to the cardiovascular risk prediction by performing two survival analyses: in the first  
48  
49 164 analysis we used Cox models where unadjusted log IL-6 was used as the predictor and CVD  
50  
51 165 mortality as the clinical outcome; then, we repeated the same analysis using log IL-6  
52  
53 166 standardised by the time of day rather than unadjusted log IL-6. For completeness of  
54  
55 167 information, we repeated this sensitivity analysis for NT-ProBNP and t-PA.  
56

57 168

## 58 169 **Results**

59 170 The characteristics of the study participants (mean age 68.7 years, standard deviation (SD) =  
60



1  
2  
3 171 5.5) are reported in Table 1. The associations between time of day (by hour) and risk factors  
4  
5 172 are shown in Figure 1. Evidence of an increase over the course of the day was particularly  
6  
7 173 noticeable for IL-6, and for NT-ProBNP (Figure 1). Also, levels of t-PA were lower in the  
8  
9 174 afternoon in comparison with morning, while variations by time of day for other risk factors  
10  
11 175 were not clearly observable from the plots (Figure 1). The results of corresponding linear  
12  
13 176 regression analyses are shown in Table 2: statistically significant associations between time  
14  
15 177 of the day and some outcomes were found (Table 2): over the course of the examination  
16  
17 178 day NT-ProBNP levels increased by 3.3% per hour (95% CI 1.9; 4.8%), IL-6 increased by 2.6%  
18  
19 179 per hour (95% CI 1.8; 3.4%). Conversely, t-PA decreased by 3.3% per hour (95% CI 3.7; 2.9%).  
20  
21 180 The proportion of variance associated with time of the day from the fully adjusted models  
22  
23 181 was 0.5%, 1%, and 2% for NT-ProBNP, IL-6, and t-PA respectively.

24  
25 183 C-Reactive Protein, Fibrinogen, D-Dimer, von Willebrand Factor, and cardiac Troponin T  
26  
27 184 showed no consistent associations with time of day (Table 2).

#### 28 29 30 186 *Sensitivity analyses*

31  
32 187 Overall, we found that fasting time did not alter the magnitude of associations between  
33  
34 188 time of the day and the outcomes reported in Table 2. Only the association between time of  
35  
36 189 the day and t-PA was strongly attenuated after accounting for fasting time (fitted as  
37  
38 190 continuous variable): the decrease in t-PA levels was -3.3% (95%CI -3.7; -2.9) per hour  
39  
40 191 before the adjustment (Table 2) and -1.4% (95%CI -2.2; -0.1) after the adjustment for  
41  
42 192 fasting. An additional adjustment for diabetes status did not alter the magnitude of the  
43  
44 193 association between hour of the day and the outcomes. We also performed the analysis  
45  
46 194 excluding men with diabetes completely (Table 2 – Model 3), but the association between  
47  
48 195 time of day and the outcomes did not substantially change.

49  
50 197 For all outcomes, we also did not find evidence for an interaction between of time of day  
51  
52 198 with age (results not shown).

53  
54  
55 200 In stratified analysis, NT-ProBNP levels increased by 3.4% (95% CI 1.9; 4.8%,  $p < 0.001$ ) per  
56  
57 201 hour in older men without heart failure. Although men who previously had heart failure had  
58  
59 202 increased NT-ProBNP levels, there was no evidence for an interaction between previous  
60

1  
2  
3 203 heart failure with time of the day ( $p=0.954$ ). After excluding 466 men with NTproBNP levels  
4 204  $>400\text{pg/ml}$  (12% of the sample), associations between time of the day measures and  
5  
6 205 NTproBNP remained statistically significant and slightly increased in magnitude (3.9% [95%  
7  
8 206 CI 2.7; 5.1%],  $p<0.001$ ). As reported in the main analysis, no significant associations were  
9  
10 207 found between time of the day and cTnT in stratified analysis.  
11

12 208  
13 209 When adding a quadratic term to the model, we found a significant improvement in model  
14 210 fit for IL-6 only ( $p=0.030$  for the time of day squared term). The association of time of day  
15 211 with IL-6 appeared to be slightly J-shaped, with a linear increase starting from 11:00 until  
16 212 19:00 hours.  
17  
18  
19  
20

21 213  
22 214 We examined whether adjustment for hour of day affected the associations between risk  
23 215 factors and CVD mortality. In survival analysis, higher levels of log IL-6 were associated with  
24 216 increased CVD mortality (HR=1.70, 95%CI 1.54; 1.87). Standardising IL-6 by time of the day  
25 217 did not change the relationship (HR=1.71, 95%CI 1.55; 1.88). Also, standardising NT-ProBNP  
26 218 levels by time of the day did not alter the magnitude of the effect on CVD mortality  
27 219 (HR=1.92, 95%CI 1.81; 2.04). Finally, associations of t-PA levels with increased CVD mortality  
28 220 did not change substantially before (HR=1.74, 95%CI 1.45; 2.09) and after standardising  
29 221 (HR=1.77, 95%CI 1.47; 2.14) by time of the day.  
30  
31  
32  
33  
34  
35  
36  
37

38 222

## 39 223 **Discussion**

40 224 To our knowledge, this is the largest investigation of relationships between time of day and  
41 225 CVD risk factors in older men. After adjusting our analysis for potential confounding factors  
42 226 we demonstrated that some, but not all, CVD risk factors levels varied by time of day. In  
43 227 particular, NT-ProBNP and IL-6 increased linearly over the course of the day. Conversely, a  
44 228 decrease in t-PA was also observed; however, after accounting for fasting time the  
45 229 relationship with time of the day was strongly attenuated (therefore fasting time could  
46 230 partially explain the drop in t-PA levels observed in the afternoon vs morning). Our analyses  
47 231 showed that the contribution of time of the day to the overall variation of NT-ProBNP, IL-6,  
48 232 and t-PA was small and without clinical importance; we observed that time of day did not  
49 233 have a sufficiently strong effect to be taken into account when assessing the impact of IL-6,  
50  
51  
52  
53  
54  
55  
56  
57  
58  
59  
60

1  
2  
3 234 NT-ProBNP, and t-PA on CVD mortality. Lastly, an association of time of day with other risk  
4  
5 235 factors was not observed.

6  
7 236

8 237 Literature on time of day variation in emerging CVD markers of inflammation and  
9  
10 238 haemostasis in older adults is limited; to our knowledge this is the first time these findings  
11  
12 239 have been reported in older adults. Findings from earlier studies of younger adults were  
13  
14 240 fairly consistent with ours. For example a recent meta-analysis of several small studies  
15  
16 241 which analysed IL-6 proposed a diurnal pattern, with overall IL-6 levels increased between  
17  
18 242 08:00 and 19:00 hours as in our study <sup>16</sup>. However, in two previous very small studies of  
19  
20 243 twelve <sup>17</sup> and five <sup>18</sup> participants, IL-6 peaked in the night-time. It is possible that peaks in IL-  
21  
22 244 6 levels may be associated with cognitive symptoms of depression <sup>19</sup> and daily activities,  
23  
24 245 although in the BRHS population this has not yet been investigated. One previous study  
25  
26 246 found that BRHS men were more active in the morning and in early afternoon <sup>20</sup> when the  
27  
28 247 main activities were usually gardening, house works, shopping, or leisure walking. Whether  
29  
30 248 IL-6 was implicated in this daily pattern remains uncertain and can potentially be explored in  
31  
32 249 future studies.

33 250

34 251 Moreover, one previous study reported increased levels of NT-ProBNP over the course of  
35  
36 252 day <sup>21</sup> as we observed in our study. A decrease in t-PA over the examination day was also  
37  
38 253 reported in younger subjects (a 45-year-old UK population of 9377 men and women) <sup>6</sup>;  
39  
40 254 however, t-PA did not vary by time of the day in a previous study large study of 1288  
41  
42 255 healthy 25 to 64-year-old men and women <sup>22</sup>.

43 256

44 257 In comparison to our study, findings regarding CRP, Fibrinogen, D-dimer, vWF and cTnT  
45  
46 258 reported in earlier studies of younger adults were similar: a few previous studies reported  
47  
48 259 that they did not find an association of time of day with CRP <sup>23</sup>, D-dimer <sup>24</sup>, and vWF <sup>25</sup>. In  
49  
50 260 one study, the variation in CRP, Fibrinogen, D-dimer, and vWF attributable to time of day  
51  
52 261 was minimal <sup>6</sup>. Literature on cTnT is scarce: one small previous study of repeated measures  
53  
54 262 in 7 participants with type 2 diabetes reported a decrease in cTnT between 8am and 8pm <sup>26</sup>.

55 263

56 264 Although one previous study suggested that diurnal variations in CVD risk factors could be  
57  
58 265 relevant for cardiovascular risk prediction <sup>6</sup>, a prediction model like the one described in our  
59  
60

1  
2  
3 266 survival analysis was not performed. Our findings suggested the effect of time of the day  
4 267 (from 08:00 h to 19:00 h) is not relevant for the CVD risk assessment. With this sensitivity  
5  
6 268 analysis we wanted to investigate time of day variations beyond simple descriptive diurnal  
7  
8 269 patterns; to our knowledge this is the first time this finding has been reported.  
9

10 270

### 11 271 *Strengths and limitations*

12 272 The BRHS cohort benefits from using a large scale population-based sample of free-living  
13  
14 273 older men and this increases statistical power and precision of estimates. However, the  
15  
16 274 BRHS comprises male participants, predominantly of white European ethnic origin, so  
17  
18 275 findings may not be generalisable to women and non-white ethnic groups. The CVD risk  
19  
20 276 factors measurements were carried out on one occasion over an extended period of the day  
21  
22 277 (between 08:00 and 19:00 hours), offering only a partial understanding of the variations  
23  
24 278 over the 24 hours<sup>27 28</sup>. Therefore, in this study the relationship of the CVD risk factors to  
25  
26 279 time of day was explored using between-participant variation only. In future studies it may  
27  
28 280 be advantageous to carry out repeated measurement of the risk factors over the 24 hours in  
29  
30 281 order to investigate within-person circadian variations. However, with repeated  
31  
32 282 measurements a possible and genuine diurnal variation may be disrupted and natural  
33  
34 283 sleeping patterns altered (repeated measures are usually taken every 1-2 hours during the  
35  
36 284 night)<sup>29</sup>.

37 285

### 38 286 *Implications*

39  
40 287 Variations of some CVD factors (in particular IL-6 and NT-ProBNP) over the course of the day  
41  
42 288 were observed, suggesting the role of time of the day as potential confounder during the  
43  
44 289 measurements. However, standardising these biological markers by time of day was not  
45  
46 290 particularly relevant for the cardiovascular risk prediction. Also, other sensitivity analyses  
47  
48 291 (stratified analysis and interaction tests) did not add relevant insights suggesting that time  
49  
50 292 of day variations may be not important for clinical risk stratification in general. Further  
51  
52 293 studies assessing both CVD risk factors levels and clinical outcomes (e.g. fatal or non-fatal  
53  
54 294 CVD events) during 24h are required to demonstrate whether a rapid increase of IL-6 over  
55  
56 295 the day may be relevant to the increased number of CVD events observed in early and late  
57  
58 296 morning<sup>30</sup>, and whether the increased levels of NT-ProBNP over the day are related to the  
59  
60 297 afternoon peak in sudden death following heart failure<sup>31</sup>.

298

**299 Conclusions**

300 Variations in time of day were associated with variations of some, but not all, CVD risk  
301 factors measured in older adults. The contribution of time of the day to the markers' overall  
302 variation was small and unlikely to affect the CVD risk prediction or clinical risk stratification.

303

**304 AUTHORS CONTRIBUTIONS**

305 CS processed the data, performed statistical analyses, drafted and revised the manuscript,  
306 and incorporated revisions of co-authors. PHW, SGW, BJ, and RM contributed to the design  
307 of the study and revised the manuscript. LL enrolled participants, and collected data. PHW,  
308 RM and SGW raised grant funding. All authors gave an intellectual contribution to the  
309 manuscript and approved the final version.

**310 Acknowledgements**

311 The BRHS is supported by a British Heart Foundation (BHF) programme grant  
312 (RG/13/16/30528). This research was supported by a BHF project grant (PG/13/41/30304)  
313 which supported CS. The funders had no role in the design and conduct of the study;  
314 collection, management, analysis, and interpretation of the data; preparation, review, or  
315 approval of the manuscript; and the decision to submit the manuscript for publication. The  
316 views expressed in this publication are those of the author(s) and not necessarily those of  
317 the BHF.

**318 Conflict of interest statement**

319 The authors report no relationships that could be construed as a conflict of interest

**320 Data Sharing statement**

321 The collection and management of data over the last 39 years of the BRHS has been made  
322 possible through grant funding from UK government agencies and charities. We welcome  
323 proposals for collaborative projects and data sharing. For general data sharing enquiries,  
324 please contact Lucy Lennon (l.lennon@ucl.ac.uk).

325 **Table 1** –Individual characteristics and risk factors levels in the British Regional Heart Study  
 326 (BRHS) men who attended the examinations in 1998-2000

|                                                   |               |
|---------------------------------------------------|---------------|
| <i>Demographic and background characteristics</i> |               |
| Age (years), mean (Standard Deviation, SD)        | 68.7 (5.5)    |
| Social class (manual)                             |               |
| Manual, n (%)                                     | 2166 (51.1)   |
| Non-Manual, n (%)                                 | 1966 (46.3)   |
| Armed Forces, n (%)                               | 112 (2.6)     |
| <i>Physical health</i>                            |               |
| Body Mass Index, mean (SD)                        | 26.9 (3.7)    |
| Prevalence of stroke/myocardial infarction, n (%) | 153 (3.6)     |
| Prevalence of heart failure, n (%)                | 390 (9.2)     |
| Diabetes, n (%)                                   | 478 (11.2)    |
| <i>Behavioural factors</i>                        |               |
| Smoking                                           |               |
| Never, n (%)                                      | 1233 (29.1)   |
| Ex-smokers, n (%)                                 | 2464 (58.0)   |
| Smokers, n (%)                                    | 548 (12.9)    |
| Alcohol consumption                               |               |
| None, n (%)                                       | 431 (10.3)    |
| Occasional/light, n (%) <sup>1</sup>              | 2949 (70.5)   |
| Moderate/Heavy, n (%) <sup>2</sup>                | 779 (18.6)    |
| Physical activity level                           |               |
| Inactive, n (%)                                   | 471 (11.5)    |
| Occasionally, n (%)                               | 957 (23.4)    |
| Light, n (%)                                      | 767 (18.7)    |
| Moderate, n (%)                                   | 591 (14.4)    |
| Moderate vigorous, n (%)                          | 690 (16.8)    |
| Vigorous, n (%)                                   | 621 (15.1)    |
| <i>CVD risk factor, geometric mean (SD) †</i>     |               |
| CRP, mg/L                                         | 1.74 (3.03)   |
| IL-6, pg/mL                                       | 2.46 (1.94)   |
| Fibrinogen, g/L                                   | 3.19 (1.25)   |
| t-PA, ng/mL                                       | 10.23 (1.50)  |
| vWF, IU/dL                                        | 132.41 (1.40) |
| D-dimer, ng/mL                                    | 84.32 (2.32)  |
| NT-ProBNP, pg/mL                                  | 101.50 (3.32) |
| cTnT, pg/mL                                       | 12.07 (1.64)  |

<sup>1</sup> >=1 and <=15 units per week (1 unit is approximately 1 drink, such as one glass of wine)

<sup>2</sup> >=16 units per week (1 unit is approximately 1 drink, such as one glass of wine)

<sup>†</sup> Abbreviations: C-Reactive Protein (CRP), Interleukin-6 (IL-6), Fibrinogen, tissue plasminogen activator (t-PA) , von Willebrand factor (vWF), fibrin D-dimer, N-terminal pro-brain natriuretic peptide (NT-ProBNP), and cardiac Troponin T (cTnT)

1  
2  
3  
4  
5  
6  
7  
8  
9  
10  
11  
12  
13  
14  
15  
16  
17  
18  
19  
20  
21  
22  
23  
24  
25  
26  
27  
28  
29  
30  
31  
32  
33  
34  
35  
36  
37  
38  
39  
40  
41  
42  
43  
44  
45  
46  
47  
48  
49

332 **Table 2** – Cross-sectional adjusted associations between time of day (fitted as continuous variable) and cardiovascular disease (CVD) risk  
333 factors measured in the British Regional Heart Study (BRHS) men (aged 60-79) attending the follow-up year 20 examination in 1998-2000.  
334 Associations are reported as percent difference in CVD risk factors levels per one hour of sampling over the examination day (08:00-19:00h).  
335 The statistically significant associations are marked in bold.

| CVD risk factor † | Model 1:<br>Age adjusted <sup>1</sup>                                                                  |                  | Model 2:<br>Fully adjusted <sup>2</sup>                                                                |                  | Model 3:<br>Fully adjusted <sup>2</sup> excluding men with diabetes                                    |                  |
|-------------------|--------------------------------------------------------------------------------------------------------|------------------|--------------------------------------------------------------------------------------------------------|------------------|--------------------------------------------------------------------------------------------------------|------------------|
|                   | Percent difference<br>(95%CI)<br>in the CVD risk factor<br>levels per hour of<br>sampling <sup>3</sup> | p-value          | Percent difference<br>(95%CI)<br>in the CVD risk factor<br>levels per hour of<br>sampling <sup>3</sup> | p-value          | Percent difference<br>(95%CI)<br>in the CVD risk factor<br>levels per hour of<br>sampling <sup>4</sup> | p-value          |
| NT-ProBNP         | <b>3.5 (2.0;5.0)</b>                                                                                   | <b>&lt;0.001</b> | <b>3.3 (1.9; 4.8)</b>                                                                                  | <b>&lt;0.001</b> | 3.5 (2.0; 5.0)                                                                                         | <b>&lt;0.001</b> |
| IL-6              | <b>2.6 (1.7;3.4)</b>                                                                                   | <b>&lt;0.001</b> | <b>2.6 (1.8; 3.4)</b>                                                                                  | <b>&lt;0.001</b> | 2.4 (1.6; 3.3)                                                                                         | <b>&lt;0.001</b> |
| t-PA              | <b>-3.3 (-3.8;-2.9)</b>                                                                                | <b>&lt;0.001</b> | <b>-3.3 (-3.7; -2.9)</b>                                                                               | <b>&lt;0.001</b> | -3.2 (-3.6; -2.7)                                                                                      | <b>&lt;0.001</b> |
| Fibrinogen        | -0.2 (-0.5;0.0)                                                                                        | 0.088            | -0.2 (-0.5; 0.1)                                                                                       | 0.104            | -0.2 (-0.5; 0.1)                                                                                       | 0.149            |
| cTnT              | -0.4 (-0.9;0.2)                                                                                        | 0.194            | -0.4 (-1.0; 0.2)                                                                                       | 0.174            | -0.4 (-1.0; 0.2)                                                                                       | 0.165            |
| CRP               | -1.0 (-2.3;0.4)                                                                                        | 0.151            | -0.9 (-2.2; 0.4)                                                                                       | 0.175            | -0.9 (-2.2; 0.5)                                                                                       | 0.191            |
| vWF               | -0.2 (-0.6;0.2)                                                                                        | 0.374            | -0.2 (-0.6; 0.2)                                                                                       | 0.380            | -0.1 (-0.5; 0.3)                                                                                       | 0.703            |
| D-Dimer           | -0.0 (-1.0;1.0)                                                                                        | 0.929            | -0.1 (-1.0; 0.9)                                                                                       | 0.890            | -0.1 (-1.2; 0.9)                                                                                       | 0.801            |

<sup>1</sup> Model 1: Two level linear models (level 1 = person, level 2 = town of residence during the BRHS recruitment) adjusted for age. Model 1 used the same number of observations of Model 2 (complete case analysis).

<sup>2</sup> Model 1 additionally adjusted for social class, Body Mass Index, smoking status, alcohol consumption, physical activity, use of statin, and season. Associations with IL-6, t-PA, Fibrinogen, CRP, vWF, and D-Dimer were additionally adjusted for prevalence of stroke/MI, while association of time of the day with NT-ProBNP and cTnT models were additionally adjusted for prevalence of heart failure.

<sup>3</sup> Model 1 and Model 2 used the same number of observations: 3580 for NT-ProBNP, 3832 for IL-6, 3863 for t-PA, 3861 for Fibrinogen, 3827 for cTnT, 3838 for CRP, 3863 for vWF, 3859 for D-Dimer

<sup>4</sup> Model 3 number of observations: 3176 for NT-ProBNP, 3398 for IL-6, 3429 for t-PA, 3427 for Fibrinogen, 3398 for cTnT, 3405 for CRP, 3429 for vWF, 3425 for D-Dimer

† Abbreviations: C-Reactive Protein (CRP), Interleukin-6 (IL-6), Fibrinogen, tissue plasminogen activator (t-PA) , von Willebrand factor (vWF), fibrin D-dimer, N-terminal pro-brain natriuretic peptide (NT-ProBNP), and cardiac Troponin T (cTnT)

346

## References

1. Pocock SJ, Ashby D, Shaper AG, *et al.* Diurnal variations in serum biochemical and haematological measurements. *Journal of clinical pathology*. 1989; 42: 172-9.
2. Emberson JR, Whincup PH, Walker M, *et al.* Biochemical measures in a population-based study: effect of fasting duration and time of day. *Annals of clinical biochemistry*. 2002; 39: 493-501.
3. Elliott WJ. Circadian variation in blood pressure: Implications for the elderly patient. *American Journal of Hypertension*. 1999; 12: 43S-9S.
4. IL6R Genetics Consortium and Emerging Risk Factors Collaboration. Interleukin-6 receptor pathways in coronary heart disease: a collaborative meta-analysis of 82 studies. *The Lancet*. 2012; 379: 1205-13.
5. Wannamethee SG, Shaper AG, Papacosta O, *et al.* Lung function and airway obstruction: associations with circulating markers of cardiac function and incident heart failure in older men-the British Regional Heart Study. *Thorax*. 2016; 71: 526-34.
6. Rudnicka AR, Rumley A, Lowe GD, *et al.* Diurnal, seasonal, and blood-processing patterns in levels of circulating fibrinogen, fibrin D-dimer, C-reactive protein, tissue plasminogen activator, and von Willebrand factor in a 45-year-old population. *Circulation*. 2007; 115: 996-1003.
7. Natriuretic Peptides Studies Collaboration. Natriuretic peptides and integrated risk assessment for cardiovascular disease: an individual-participant-data meta-analysis. *The lancet Diabetes & endocrinology*. 2016; 4: 840-9.
8. Shaper AG, Pocock SJ, Walker M, *et al.* British Regional Heart Study: cardiovascular risk factors in middle-aged men in 24 towns. *BMJ*. 1981; 283: 179-86.
9. Pocock SJ, Shaper AG, Cook DG, *et al.* British Regional Heart Study: geographic variations in cardiovascular mortality, and the role of water quality. *British Medical Journal*. 1980; 280: 1243-9.
10. Declaration of Helsinki - Ethical Principles for Medical Research Involving Human Subjects. *WMA Declaration of Helsinki*. WMA Declaration of Helsinki October 2013.
11. Wannamethee G and Shaper AG. Physical activity and stroke in British middle aged men. *BMJ : British Medical Journal*. 1992; 304: 597-601.
12. Jefferis BJ, Sartini C, Ash S, *et al.* Validity of questionnaire-based assessment of sedentary behaviour and physical activity in a population-based cohort of older men; comparisons with objectively measured physical activity data. *Int J Behav Nutr Phys Act*. 2016; 13: 14.
13. Sartini C, Barry SJ, Wannamethee SG, *et al.* Effect of cold spells and their modifiers on cardiovascular disease events: Evidence from two prospective studies. *Int J Cardiol*. 2016; 218: 275-83.
14. Stolwijk AM, Straatman H and Zielhuis GA. Studying seasonality by using sine and cosine functions in regression analysis. *Journal of Epidemiology and Community Health*. 1999; 53: 235-8.
15. Wannamethee SG, Whincup PH, Lennon L, *et al.* Associations Between Fibrin D-Dimer, Markers of Inflammation, Incident Self-Reported Mobility Limitation, and All-Cause Mortality in Older Men. *Journal of the American Geriatrics Society*. 2014; 62: 2357-62.
16. Nilsson G, Lekander M, Åkerstedt T, *et al.* Diurnal variation of circulating interleukin-6 in humans: a meta-analysis. *bioRxiv*. 2016.



- 1  
2  
3 393 17. Gudewill S, Pollmacher T, Vedder H, *et al.* Nocturnal plasma levels of cytokines in  
4 394 healthy men. *European archives of psychiatry and clinical neuroscience.* 1992; 242:  
5 395 53-6.  
6 396 18. Bauer J, Hohagen F, Ebert T, *et al.* Interleukin-6 serum levels in healthy persons  
7 397 correspond to the sleep-wake cycle. *The Clinical investigator.* 1994; 72: 315-  
8 398 19. Gimeno D, Kivimaki M, Brunner EJ, *et al.* Associations of C-reactive protein and  
9 399 interleukin-6 with cognitive symptoms of depression: 12-year follow-up of the  
10 400 Whitehall II study. *Psychological medicine.* 2009; 39: 413-23.  
11 401 20. Sartini C, Wannamethee SG, Iliffe S, *et al.* Diurnal patterns of objectively measured  
12 402 physical activity and sedentary behaviour in older men. *BMC Public Health.* 2015;  
13 403 15: 609.  
14 404 21. Goetze JP, Jorgensen HL, Sennels HP, *et al.* Diurnal plasma concentrations of  
15 405 natriuretic propeptides in healthy young males. *Clinical chemistry.* 2012; 58: 789-92.  
16 406 22. Eliasson M, Evrin PE, Lundblad D, *et al.* Influence of gender, age and sampling time  
17 407 on plasma fibrinolytic variables and fibrinogen. *Fibrinolysis.* 1993; 7: 316-23.  
18 408 23. Meier-Ewert HK, Ridker PM, Rifai N, *et al.* Absence of diurnal variation of C-  
19 409 reactive protein concentrations in healthy human subjects. *Clinical chemistry.* 2001;  
20 410 47: 426-30.  
21 411 24. Jafri SM, VanRollins M, Ozawa T, *et al.* Circadian variation in platelet function in  
22 412 healthy volunteers. *Am J Cardiol.* 1992; 69: 951-4.  
23 413 25. Bridges AB, McLaren M, Scott NA, *et al.* Circadian variation of tissue plasminogen  
24 414 activator and its inhibitor, von Willebrand factor antigen, and prostacyclin stimulating  
25 415 factor in men with ischaemic heart disease. *British Heart Journal.* 1993; 69: 121-4.  
26 416 26. Klinkenberg LJ, van Dijk JW, Tan FE, *et al.* Circulating cardiac troponin T exhibits a  
27 417 diurnal rhythm. *Journal of the American College of Cardiology.* 2014; 63: 1788-95.  
28 418 27. Bremner WF, Sothorn RB, Kanabrocki EL, *et al.* Relation between circadian patterns  
29 419 in levels of circulating lipoprotein(a), fibrinogen, platelets, and related lipid variables  
30 420 in men. *American heart journal.* 2000; 139: 164-73.  
31 421 28. Kristal-Boneh E, Harari G and Green MS. Seasonal Change in 24-Hour Blood  
32 422 Pressure and Heart Rate Is Greater Among Smokers Than Nonsmokers. *Hypertension.*  
33 423 1997; 30: 436-41.  
34 424 29. Vgontzas AN, Zoumakis M, Bixler EO, *et al.* Impaired nighttime sleep in healthy old  
35 425 versus young adults is associated with elevated plasma interleukin-6 and cortisol  
36 426 levels: physiologic and therapeutic implications. *J Clin Endocrinol Metab.* 2003; 88:  
37 427 2087-95.  
38 428 30. Elliott WJ. Circadian variation in the timing of stroke onset: a meta-analysis. *Stroke;*  
39 429 *a journal of cerebral circulation.* 1998; 29: 992-6.  
40 430 31. Carson PA, O'Connor CM, Miller AB, *et al.* Circadian rhythm and sudden death in  
41 431 heart failure Results from prospective randomized amlodipine survival trial. *Journal of*  
42 432 *the American College of Cardiology.* 2000; 36: 541-6.

433

1  
2  
3 434 **Figure 1** – Unadjusted geometric means (95% CI) by time of the day<sup>1</sup> for C-Reactive Protein (CRP), Interleukin-6  
4 435 (IL-6), Fibrinogen, tissue plasminogen activator (t-PA), von Willebrand factor (vWF), fibrin D-dimer, N-terminal  
5 436 pro-brain natriuretic peptide (NT-ProBNP), and cardiac Troponin T (cTnT) measured on one occasion in BRHS  
6 437 men aged 60-79 during the years 1998-2000.  
7 438

8  
9 439

10 440 <sup>1</sup>Total number of men examined per hour was 33(0.7%) at 08:00-08:59, 363(8.5%) at 8:00-9:59h, 699(16%) at  
11 441 10:00-10:59h, 771(18%) at 11:00-11:59h, 591(14%) at 12:00-12:59h, 99(2%) at 13:00-13:59h, 306(7%) at  
12 442 14:00-14:59), 560(13%) at 15:00-15:59h, 566(13%) at 16:00-16:59, 260(6%) at 17:00-17:59, and 3(<0.1%) at  
13 443 18:00-18:59  
14 444

15  
16  
17  
18  
19  
20  
21  
22  
23  
24  
25  
26  
27  
28  
29  
30  
31  
32  
33  
34  
35  
36  
37  
38  
39  
40  
41  
42  
43  
44  
45  
46  
47  
48  
49  
50  
51  
52  
53  
54  
55  
56  
57  
58  
59  
60

1  
2  
3  
4  
5  
6  
7  
8  
9  
10  
11  
12  
13  
14  
15  
16  
17  
18  
19  
20  
21  
22  
23  
24  
25  
26  
27  
28  
29  
30  
31  
32  
33  
34  
35  
36  
37  
38  
39  
40  
41  
42  
43  
44  
45  
46  
47  
48  
49  
50  
51  
52  
53  
54  
55  
56  
57  
58  
59  
60

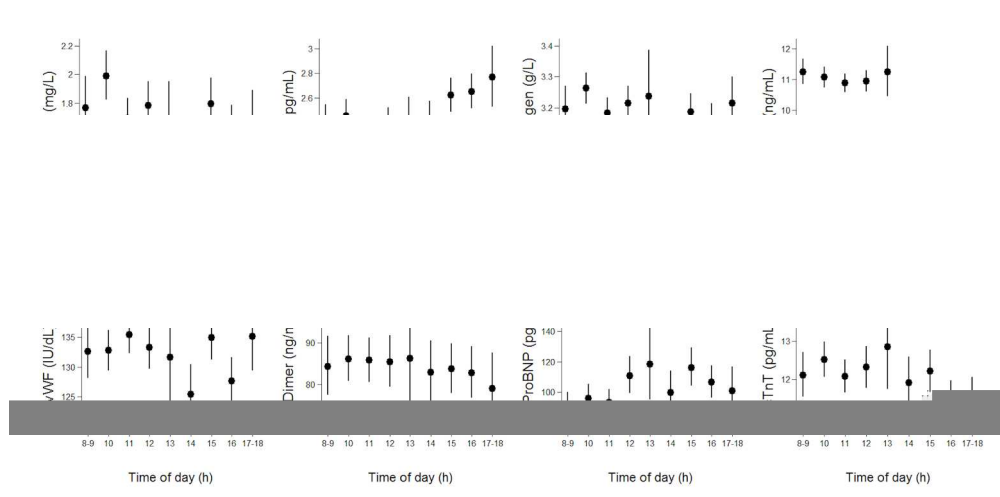

Figure 1 – Unadjusted geometric means (95% CI) by time of the day

186x99mm (300 x 300 DPI)

review only

STROBE Statement—Checklist of items that should be included in reports of *cross-sectional studies*

|                              | Item No | Recommendation                                                                                                                                                                                    |                                                                  |
|------------------------------|---------|---------------------------------------------------------------------------------------------------------------------------------------------------------------------------------------------------|------------------------------------------------------------------|
| <b>Title and abstract</b>    | 1       | (a) Indicate the study's design with a commonly used term in the title or the abstract                                                                                                            | Abstract                                                         |
|                              |         | (b) Provide in the abstract an informative and balanced summary of what was done and what was found                                                                                               | Abstract                                                         |
| <b>Introduction</b>          |         |                                                                                                                                                                                                   |                                                                  |
| Background/rationale         | 2       | Explain the scientific background and rationale for the investigation being reported                                                                                                              | Introduction, lines 54-62                                        |
| Objectives                   | 3       | State specific objectives, including any prespecified hypotheses                                                                                                                                  | Introduction, lines 54-56 and 60-62                              |
| <b>Methods</b>               |         |                                                                                                                                                                                                   |                                                                  |
| Study design                 | 4       | Present key elements of study design early in the paper                                                                                                                                           | Methods, line 66-72                                              |
| Setting                      | 5       | Describe the setting, locations, and relevant dates, including periods of recruitment, exposure, follow-up, and data collection                                                                   | Methods, lines 75-84                                             |
| Participants                 | 6       | (a) Give the eligibility criteria, and the sources and methods of selection of participants                                                                                                       | Methods, lines 66-72 and 75-84                                   |
| Variables                    | 7       | Clearly define all outcomes, exposures, predictors, potential confounders, and effect modifiers. Give diagnostic criteria, if applicable                                                          | Methods, lines 97-123                                            |
| Data sources/<br>measurement | 8*      | For each variable of interest, give sources of data and details of methods of assessment (measurement). Describe comparability of assessment methods if there is more than one group              | Methods, lines 75-123                                            |
| Bias                         | 9       | Describe any efforts to address potential sources of bias                                                                                                                                         |                                                                  |
| Study size                   | 10      | Explain how the study size was arrived at                                                                                                                                                         | Results, lines 75-78                                             |
| Quantitative variables       | 11      | Explain how quantitative variables were handled in the analyses. If applicable, describe which groupings were chosen and why                                                                      | Methods, lines 91-114                                            |
| Statistical methods          | 12      | (a) Describe all statistical methods, including those used to control for confounding                                                                                                             | Methods, lines 125-159                                           |
|                              |         | (b) Describe any methods used to examine subgroups and interactions                                                                                                                               | Methods, lines 152 and 156-158                                   |
|                              |         | (c) Explain how missing data were addressed                                                                                                                                                       |                                                                  |
|                              |         | (d) If applicable, describe analytical methods taking account of sampling strategy                                                                                                                | NA                                                               |
|                              |         | (e) Describe any sensitivity analyses                                                                                                                                                             | Methods, lines 151-159                                           |
| <b>Results</b>               |         |                                                                                                                                                                                                   |                                                                  |
| Participants                 | 13*     | (a) Report numbers of individuals at each stage of study—eg numbers potentially eligible, examined for eligibility, confirmed eligible, included in the study, completing follow-up, and analysed | Methods, lines 66-68 and 91-95                                   |
|                              |         | (b) Give reasons for non-participation at each stage                                                                                                                                              | Methods, lines 66-76                                             |
|                              |         | (c) Consider use of a flow diagram                                                                                                                                                                | Not necessary for this study, see Methods, lines 66-68 and 91-95 |

|    |                          |     |                                                                                                                                                                                                              |
|----|--------------------------|-----|--------------------------------------------------------------------------------------------------------------------------------------------------------------------------------------------------------------|
| 1  |                          |     |                                                                                                                                                                                                              |
| 2  | Descriptive data         | 14* | (a) Give characteristics of study participants (eg demographic, clinical, social) and information on exposures and potential confounders                                                                     |
| 3  |                          |     | Table 1                                                                                                                                                                                                      |
| 4  |                          |     |                                                                                                                                                                                                              |
| 5  |                          |     |                                                                                                                                                                                                              |
| 6  |                          |     | (b) Indicate number of participants with missing data for each variable of interest                                                                                                                          |
| 7  |                          |     | Table 1                                                                                                                                                                                                      |
| 8  | Outcome data             | 15* | Report numbers of outcome events or summary measures                                                                                                                                                         |
| 9  |                          |     | Table 1, Figure 1                                                                                                                                                                                            |
| 10 | Main results             | 16  | (a) Give unadjusted estimates and, if applicable, confounder-adjusted estimates and their precision (eg, 95% confidence interval). Make clear which confounders were adjusted for and why they were included |
| 11 |                          |     | Table 2                                                                                                                                                                                                      |
| 12 |                          |     |                                                                                                                                                                                                              |
| 13 |                          |     | (b) Report category boundaries when continuous variables were categorized                                                                                                                                    |
| 14 |                          |     | NA                                                                                                                                                                                                           |
| 15 |                          |     |                                                                                                                                                                                                              |
| 16 |                          |     | (c) If relevant, consider translating estimates of relative risk into absolute risk for a meaningful time period                                                                                             |
| 17 |                          |     | NA                                                                                                                                                                                                           |
| 18 |                          |     |                                                                                                                                                                                                              |
| 19 | Other analyses           | 17  | Report other analyses done—eg analyses of subgroups and interactions, and sensitivity analyses                                                                                                               |
| 20 |                          |     | Results, lines 187-195                                                                                                                                                                                       |
| 21 |                          |     |                                                                                                                                                                                                              |
| 22 | <b>Discussion</b>        |     |                                                                                                                                                                                                              |
| 23 | Key results              | 18  | Summarise key results with reference to study objectives                                                                                                                                                     |
| 24 |                          |     | Results, lines 170-181 Discussion, lines 224-235                                                                                                                                                             |
| 25 |                          |     |                                                                                                                                                                                                              |
| 26 |                          |     |                                                                                                                                                                                                              |
| 27 | Limitations              | 19  | Discuss limitations of the study, taking into account sources of potential bias or imprecision. Discuss both direction and magnitude of any potential bias                                                   |
| 28 |                          |     | Discussion, lines 272-284                                                                                                                                                                                    |
| 29 |                          |     |                                                                                                                                                                                                              |
| 30 | Interpretation           | 20  | Give a cautious overall interpretation of results considering objectives, limitations, multiplicity of analyses, results from similar studies, and other relevant evidence                                   |
| 31 |                          |     | Discussion, lines 230-234 and 272 - 284                                                                                                                                                                      |
| 32 |                          |     |                                                                                                                                                                                                              |
| 33 |                          |     |                                                                                                                                                                                                              |
| 34 | Generalisability         | 21  | Discuss the generalisability (external validity) of the study results                                                                                                                                        |
| 35 |                          |     | Discussion, lines 287-289                                                                                                                                                                                    |
| 36 |                          |     |                                                                                                                                                                                                              |
| 37 | <b>Other information</b> |     |                                                                                                                                                                                                              |
| 38 | Funding                  | 22  | Give the source of funding and the role of the funders for the present study and, if applicable, for the original study on which the present article is based                                                |
| 39 |                          |     | Acknowledgements, lines 287-302                                                                                                                                                                              |
| 40 |                          |     |                                                                                                                                                                                                              |
| 41 |                          |     |                                                                                                                                                                                                              |
| 42 |                          |     |                                                                                                                                                                                                              |

\*Give information separately for exposed and unexposed groups.

**Note:** An Explanation and Elaboration article discusses each checklist item and gives methodological background and published examples of transparent reporting. The STROBE checklist is best used in conjunction with this article (freely available on the Web sites of PLoS Medicine at <http://www.plosmedicine.org/>, Annals of Internal Medicine at <http://www.annals.org/>, and Epidemiology at <http://www.epidem.com/>). Information on the STROBE Initiative is available at [www.strobe-statement.org](http://www.strobe-statement.org).
